1 **Genomically hardwired regulation of gene activity orchestrates cellular**  
2 **iron homeostasis in Arabidopsis**

3

4 **En-Jung Hsieh<sup>1</sup>, Wen-Dar Lin<sup>1</sup>, and Wolfgang Schmidt<sup>1,2,3,\*</sup>**

5

6 <sup>1</sup>Institute of Plant and Microbial Biology, Academia Sinica, Taipei 11529, Taiwan

7 <sup>2</sup>Biotechnology Center, National Chung-Hsing University, Taichung 40227, Taiwan

8 <sup>3</sup>Genome and Systems Biology Degree Program, College of Life Science, National Taiwan  
9 University, Taipei 10617, Taiwan

10 \*corresponding author. E-mail: wosh@gate.sinica.edu.tw

11

12 **Abstract**

13 Iron (Fe) is an essential micronutrient that plays pivotal roles as electron donor and catalyst  
14 across organisms. In plants, variable, often insufficient Fe supply necessitates mechanisms  
15 that constantly attune Fe uptake rates and recalibrate cellular Fe homeostasis. Here, we show  
16 that short-term (0.5, 6, and 12 h) exposure of *Arabidopsis thaliana* plants to Fe deficiency  
17 triggered massive changes in gene activity governed by transcription and alternative splicing  
18 (AS), regulatory layers that were to a large extent mutually exclusive. Such preclusion was  
19 not observed for genes that are directly involved in the acquisition of Fe, which appears to be  
20 concordantly regulated by both expression and AS. Generally, genes with lower splice site  
21 strengths and higher intron numbers were more likely to be regulated by AS, no dependence  
22 was on gene architecture was observed for transcriptionally controlled genes. Conspicuously,  
23 specific processes were associated with particular genomic features and biased towards either  
24 regulatory mode, suggesting that genomic hardwiring is functionally biased. Early changes in  
25 splicing patterns were, in many cases, congruent with later changes in transcript or protein

26 abundance, thus contributing to the pronounced transcriptome-proteome discordance  
27 observed in plants.

28

## 29 **Introduction**

30 Iron (Fe) is mineral nutrient with a plethora of vital functions across all kingdoms of life. In  
31 plants, Fe is a critical component of electron chains in photosynthesis and required for the  
32 biosynthesis of chlorophyll. Iron is abundant in the Earth's crust, but its availability is often  
33 limited by interaction with other soil constituents, in particular at high redox and pH values.  
34 In most aerated soils, Fe is present in the form of sparingly soluble Fe(III) oxides which  
35 cannot readily be taken up by plants, causing leaf chlorosis, reduced yield, and decreased  
36 quality of edible plant parts. Low plant Fe content can jeopardise human health by causing  
37 Fe-deficiency anaemia, in particular in populations with a predominantly plant-based diet. To  
38 counteract limited Fe availability, plants have evolved a suite of mostly transcriptionally  
39 regulated responses that mediate the acquisition of Fe from recalcitrant pools in soils<sup>1,2</sup>. In  
40 contrast to graminaceous species, which take up Fe<sup>3+</sup> after secretion of Fe-avid  
41 phytosiderophores (strategy II)<sup>3</sup>, dicotyledonous plants acquire Fe<sup>2+</sup> by the concerted action  
42 of processes that mobilize sparingly soluble Fe<sup>3+</sup> by protonation, chelation, and reduction in  
43 response to imbalances caused by inadequate Fe supply (strategy I)<sup>4-8</sup>. The responses to Fe  
44 starvation are controlled by a complex network of homeostatic mechanisms that orchestrate  
45 the acquisition, transport, and cellular homeostasis of Fe<sup>9-12</sup>.

46 Due to the central role of ferrous Fe as an electron donor and catalyst, its absence or  
47 insufficiency compromises energy production and causes severe metabolic perturbations.  
48 Reduced respiration efficiency and impaired activity of Fe-containing key enzymes of the  
49 tricarboxylic acid (TCA) cycle such as aconitase or succinate dehydrogenase constitute major  
50 constraints in Fe-undernourished cells, necessitating extensive rerouting of carbon flow

51 during periods of low Fe availability. Increased glycolysis rates upon Fe starvation, for  
52 instance, have been described for diverse eukaryote systems such as human cell lines<sup>13</sup>,  
53 macrophages<sup>14</sup>, and yeast<sup>15</sup>, suggesting that enhanced glycolytic flux is a conserved  
54 mechanism to compensate for decreased respiration. In Fe-deficient plants, pronounced  
55 metabolic changes have been observed across species<sup>16-23</sup>, which, with some notable  
56 exceptions, are not mirrored in transcriptomic profiles. The mechanisms that govern such  
57 metabolic rerouting have remained largely elusive.

58         Alternative splicing (AS) of pre-mRNAs, i.e., the process of selecting different  
59 combinations of splice sites for intron removal and exon ligation, contributes to the diversity  
60 of transcripts and proteins by producing multiple mRNA and protein isoforms, and may, at  
61 least partly, be causative for the lack of transcriptional footprints of Fe deficiency-induced  
62 alterations in central carbon metabolism. In contrast to animals, where exon skipping (ES) is  
63 dominating over other forms of AS, in plants, intron retention (IR) and alternative donor or  
64 acceptor splice sites (DA) are the prevalent forms of AS<sup>24-26</sup>. While ES is likely to produce  
65 functional proteins, the latter forms of AS often interrupt the open reading frame and lead to  
66 the introduction of premature stop codons, causing the formation of aberrant proteins or  
67 mRNA that is targeted to the nonsense-mediated decay pathway<sup>27</sup>. Between 60-80% of the  
68 multi-exonic plant genes are alternatively spliced, a percentage that can vary in response to  
69 environmental stimuli or stress<sup>28-30</sup>. Thus, in plants, AS constitutes a huge and mostly  
70 unexplored source of gene regulation of undisclosed significance, possibly fine-tuning the  
71 transcriptome to the prevailing environmental conditions.

72         How environmental information is communicated into the nucleus to alter pre-mRNA  
73 splicing patterns remains largely enigmatic. AS is driven by a large suite of mRNA-binding,  
74 spliceosome-associated proteins such as serine/arginine-rich (SR) proteins and heterogeneous  
75 nuclear ribonucleoproteins (hnRNPs) that binds to *cis*-regulatory sequences on the pre-

76 mRNA. Splicing factors are altered in abundance, localization, and activity upon stress,  
77 conferring plasticity to the patterns of alternative splicing in response to internal or external  
78 stimuli<sup>31-35</sup>. Moreover, chromatin-related factors such as histone modifications and  
79 nucleosome positioning, and genomic traits such as gene body length and splice site strength  
80 were shown to affect AS<sup>30,36-38</sup>.

81 By employing short-term exposure of Arabidopsis plants to Fe deficiency as a well-  
82 explored environmental cue, we report here that the type of gene regulation (i.e., AS or  
83 differential expression) is determined by the architecture of the gene, the amplitude of the  
84 response, and the temporal pattern of the changes in gene activity. Genomic features are  
85 biased towards and typical of specific Fe-responsive processes and seem to govern AS but  
86 not transcriptional regulation, which appears to be chiefly driven by physiological  
87 requirements. While differential AS (DAS) and differential gene expression (DE) are  
88 generally complementary forms of gene regulation, we found this rule suspended when core  
89 genes of the Fe deficiency response are considered, suggesting that the two regulatory modes  
90 can operate synergistically to allow for an optimally tuned response. We further found that, in  
91 many but not all cases, DAS features observed early after the onset of Fe-deficient conditions  
92 represent a blueprint of what becomes evident at the activity, transcript, or protein level at  
93 later stages of Fe deficiency.

94

## 95 **Results**

### 96 **Iron deficiency triggers rapid changes in transcription and splicing patterns**

97 To gain insights into transcriptional and post-transcriptional alterations in response to Fe  
98 deficiency, Arabidopsis plants were subjected to 0.5, 6, and 12 hours of growth in Fe-free  
99 media and subsequent transcriptomic profiling against plants that were transferred to fresh  
100 Fe-replete nutrient solution using the RNA-seq methodology. The Illumina HiSeq 4000

101 sequencing system was adopted to acquire approximately 70-80 million reads for each library  
102 with a read length of 100 base pairs (Supplementary Table S1). On average, a total of circa  
103 27,000 genes was expressed in both roots and shoots, of which subsets of 1,161 (roots) and  
104 1,027 (shoots) were defined as differentially expressed between Fe-deficient and Fe-  
105 sufficient control plants at one or more of the three sampling time points with relevant  
106 expression levels (RPKM > the square root of the mean expression value of the whole  
107 dataset),  $P < 0.05$ , and a fold-change > 2 after normalization using the TMM (Trimmed Mean  
108 of M-values) method (Fig. 1a). In both roots and shoots, differentially expressed genes  
109 (DEGs) showed a relatively small overlap among the experimental time points, indicative of  
110 a highly dynamic and temporally distinctive response to Fe deficiency (Fig. 1c).

111 Changes in the pattern of alternative splicing (AS) upon Fe deficiency were analysed  
112 with the aid of the Read Analysis and Comparison Kit in Java (RACK J) software toolbox<sup>39</sup>.  
113 Applying the same thresholds used for the classification of DE genes and considering only  
114 genes in which the AS feature was observed in all three replicates, a subset of 7,517 genes  
115 was classified as differentially alternatively spliced (DAS), exceeding the number of  
116 differentially expressed genes (DEGs) by more than fourfold (Fig. 1f). The largest fraction of  
117 DAS genes (82%) produced transcripts that harboured differential intron retention (DIR)  
118 features, a smaller subset (15%) carried differential donor/acceptor (DDA) sites, and 2.8% of  
119 the DAS transcripts exhibited differential exon skipping (DES) after exposure to Fe  
120 deficiency (Fig. 1e). A considerable subset of DAS genes carried two or more different AS  
121 features. Genes with DAS features showed distinct overlaps among the different  
122 experimental timepoints which depended on the type of AS with DIR being more conserved  
123 than DEG and the overlap of DDA genes comparable to that observed for DEGs (Fig. 1c, d).  
124 With the exception of DES, in which enhanced and repressed features varied over time, DAS  
125 showed a neutral outcome of splicing efficiency upon exposure to Fe deficiency, with about

126 similar proportions of genes carrying enhanced or reduced splicing features (Supplementary  
127 Fig. S1).

128

### 129 **Fe deficiency induces a series of concatenated responses in roots and shoots**

130 Transfer of plants to Fe-deplete media triggered the consecutive induction of a suite of  
131 distinctly timed responses (Fig. 2). Induction of these processes was almost simultaneously  
132 observed in roots and shoots, suggesting that minor changes in Fe supply suffice to sense Fe  
133 deficiency in all plant parts. After six hours of exposure to Fe-deficient conditions, induction  
134 of the basic Fe uptake machinery comprising the Fe chelate reductase FRO2 and the Fe<sup>2+</sup>  
135 transporter IRT1, vacuolar sequestration of excessive cytosolic levels of secondary-substrate  
136 metal cations such as Mn<sup>2+</sup> and Zn<sup>2+</sup>, and downregulation of Fe import into the vacuole were  
137 the most prominent transcriptionally regulated responses in roots (Fig. 2a). Induction of these  
138 processes was accompanied by increased expression of a suite of genes encoding regulators  
139 such as the *IRONMAN* peptides *IMA1* and *IMA2* and the transcription factor *POPEYE (PYE)*  
140 (Fig. 2a). A module that was induced slightly later comprised genes mediating the  
141 mobilization of Fe in the rhizosphere via secretion of protons and Fe-mobilizing coumarins  
142 (Fig. 2b). Induction of Fe mobilisation was accompanied by increased expression of the  
143 transcription factors *MYB72* and *MYB10*, which were shown to be crucial for plant survival in  
144 soils with severely restricted Fe availability (Fig. 2 b)<sup>40</sup>. Notably, sampling at very early  
145 stages of Fe deficiency (0.5 h) revealed expression changes in a direction which was  
146 antagonistic to that observed at later stages, suggesting that rearrangements of the  
147 transcriptional machinery cause transient perturbations in gene expression that later result in  
148 robust transcriptional regulation of these genes (Supplementary Tables S2-5).

149 In shoots, exposure to Fe-deplete media for 6 hours induced Fe transport across the  
150 plasma membrane via OPT3 and IRT3 and expression of a variety of regulators such as *PYE*,

151 the E3 ligase *BRUTUS* (*BTS*), subgroup Ib bHLH proteins, and *IMAI-IMA3* (Fig. 2c). Similar  
152 to root cells, sequestration of transition metals into the vacuole was induced at this time point.  
153 In addition, altered transcription of genes involved in ROS homeostasis (*CGLD27*, *ENH1*)  
154 was observed in shoots (Supplementary Table S2). After 12 hours, increased trans-plasma  
155 membrane transport of Fe-nicotianamine (NA) by YSL1 and Cu<sup>2+</sup> via COPT2 can be inferred  
156 from the induction of the cognate genes at this time-point. Also, chlorophyll metabolism  
157 (*HEMA1*, *NYCI*) and ROS homeostasis (*NEET*) were affected by growth on Fe-deplete  
158 media (Fig. 2d; Supplementary Table S2).

159  
160 In addition to genes directly involved in Fe homeostasis, in roots, and to a lesser extent in  
161 shoots, short-term exposure to Fe deficiency caused a dramatic increase in the transcription  
162 of genes associated with jasmonic acid (JA) biosynthesis and signalling (Fig. 3;  
163 Supplementary Table S2 and S3), a response which was strictly restricted to the 6-hour time  
164 point. In particular, the first steps of JA biosynthesis and the expression of a suite of  
165 transcriptional regulators, referred to as jasmonate ZIM-domain (JAZ) proteins, were  
166 strongly induced in response to Fe deficiency (Fig. 3).

167

### 168 **DAS orchestrates rerouting of the central carbon metabolism**

169 Glycolysis is a key process in energy production and provides metabolic intermediates for  
170 biosynthetic processes, storage, and anaplerotic processes. A subset of 75 genes associated  
171 with glycolysis was regulated by the Fe regime, almost exclusively by DAS (Supplementary  
172 Table S4). Notable exceptions from this pattern were the first and the last step in glycolysis,  
173 catalysed by phosphofructokinase (PFK) and pyruvate kinase (PK), which are robustly  
174 upregulated at later stages of iron deficiency in transcriptional surveys<sup>9,11</sup>. Analysis of *PFK1*  
175 expression by RT-qPCR showed increasing induction over the first three days of Fe

176 deficiency in roots and, to a much lesser extent, in shoots (Fig. 4a, c). Expression of the Fe  
177 status marker *bHLH38* was increased over the first three days of Fe deficiency with a higher  
178 transcript level in shoots, indicating that the lower induction of *PFKI* in shoots was not  
179 associated with a healthier Fe status of leaf cells (Fig. 4c). Since PFK is catalysing the rate-  
180 limiting step in glycolysis, it can be assumed that glycolytic flux is particularly increased in  
181 root cells. The final step in glycolysis, the PK-mediated conversion of phosphoenolpyruvate  
182 (PEP) to pyruvate, was repressed in roots via enhanced IR of the cytosolic PK isoform  
183 At5g08570. In shoots, transcripts of this isoform carried reduced IR upon exposure to Fe  
184 deficiency. RT-qPCR analysis revealed decreased transcript abundance of this isoform in  
185 both roots and shoots one day after exposure to Fe-deplete media (Fig. 4d). Downregulation  
186 of another PK-encoding gene in roots (At3g49160) was reported in several transcriptomic  
187 studies<sup>7,11</sup>, further supporting the supposition that PK activity is decreased upon Fe deficiency.

188 For several steps of root glycolysis, DAS appear to precede changes in enzyme  
189 activity or abundance. Fructose-bisphosphate aldolase (FBA) catalyses the reversible aldol  
190 cleavage of fructose-1,6-bisphosphate, yielding dihydroxyacetone phosphate. In roots, the  
191 cytosolic isoform *FBA8* exhibited both repressed IR and DA features (Fig. 4a). Also, the  
192 cytosolic phosphoglycerate mutase (PGM) isoforms *iPGAM1* and *iPGAM2* showed reduced  
193 IR upon Fe deficiency (Fig. 4a). In a previous study, we observed increased phosphorylation  
194 of *FBA8* and *iPGAM1* protein and accumulation of the (cytosolic) *FBA4* protein in roots  
195 upon prolonged Fe deficiency<sup>23,41</sup>, indicating Fe deficiency-induced increase in enzyme  
196 activity at later stages of Fe deficiency. Moreover, *FBA* and *PGM* accumulated in Fe-  
197 deficient roots of *Beta vulgaris* and *Cucumis sativa*<sup>19,42</sup>, suggesting that increased abundance  
198 of these enzymes in response to Fe deficiency is conserved across strategy-I species.

199 The anti-directional regulation of PFK and PK in roots of Fe-deficient plants implies  
200 imbalances of glycolysis intermediates under conditions of Fe starvation. To further



201 investigate this matter, we determined the concentrations of glucose-6-phosphate (G6P),  
202 phospho*enol*pyruvate (PEP), and pyruvate over the first three days of Fe deficiency via  
203 UHPLC-MS analysis. In roots, but not in shoots, the level of both PEP and pyruvate was  
204 increased three days after the onset of Fe deficiency, indicating severe perturbances of  
205 pyruvate metabolism at later stages of Fe deficiency (Fig. 4b). Other glycolysis intermediates  
206 such as G6P or fructose-6-phosphate (F6P) did neither show pronounced changes in roots nor  
207 in shoots upon short-term or extended exposure to Fe deficiency (Fig. 4b), suggesting that the  
208 concentrations of these intermediates are in steady-state during Fe deficiency.

209

### 210 **The TCA cycle malfunctions in roots of Fe-deficient plants**

211 A subset of 34 of TCA-related genes was responsive to the Fe regime (Supplementary Table  
212 S5). Similar to what has been observed for glycolysis, genes encoding enzymes of the TCA  
213 cycle showed limited transcriptional control and were predominantly regulated by DAS  
214 (Supplementary Table S5). In roots, all TCA cycle metabolites under study accumulated  
215 three days after the onset of Fe deficiency, with citrate, malate, and succinate being most  
216 abundant (Supplementary Fig. S3). In particular, citrate levels were strongly increased; no  
217 such accumulation was observed in shoots. Citrate is synthesized in the first committed and  
218 pace-making step of the cycle by condensation of oxaloacetate and acetyl CoA, catalysed by  
219 citrate synthase (CSY). However, the mitochondrial isoforms *CSY4* and *CSY5* were neither  
220 regulated by DAS nor by DE, suggesting other causes for the increased citrate levels.  
221 Aconitase (ACO), catalysing the subsequent conversion of citrate to isocitrate, harbours an  
222 active  $[\text{Fe}_4\text{S}_4]^{2+}$  cluster, which may compromise ACO activity in Fe-deficient plants and  
223 contribute to the accumulation of citrate. In line with this assumption, *ACO2* and *ACO3* were  
224 transcriptionally downregulated in roots three days after transfer to Fe-deficient media<sup>7,9,43</sup>,  
225 indicating restricted conversion of citrate into isocitrate. Also other enzymes of the TCA

226 cycle such as citrate synthase and isocitric dehydrogenase were shown to affect by the iron  
227 regime<sup>13</sup>, further supporting the notion that the TCA cycle is compromised or truncated under  
228 conditions of Fe deficiency. This scenario is supported by a lack of consistent and mostly  
229 repressive DAS-regulation of all steps of the TCA cycle (Supplementary Fig. S3).

230

### 231 **The routes of pyruvate metabolism differ between roots and shoots**

232 Pyruvate derived from glycolysis can be either converted to acetyl-CoA by pyruvate  
233 dehydrogenase (PDH) in the mitochondrial matrix, or decarboxylated to acetaldehyde  
234 through pyruvate decarboxylase (PDC) in the cytosol. PDH is a multienzyme complex  
235 composed of three enzymes, pyruvate dehydrogenase (E1), dihydrolipoyl transacetylase (E2),  
236 and dihydrolipoyl dehydrogenase (E3). In roots, isoforms of all three enzymes showed  
237 generally reduced IR upon Fe deficiency (Fig. 5a). In shoots, a more complex, mostly  
238 repressive regulation was observed (Fig. 5b). Alcohol dehydrogenase (ADH) reduces  
239 pyruvate-derived acetaldehyde to ethanol and NAD<sup>+</sup>. In roots, short-term exposure to Fe  
240 deficiency resulted in repressed IR of both *PDC1* and *ADH1* transcripts, indicative of  
241 increased ethanolic fermentation (Fig. 5a). Also, the class III type alcohol dehydrogenase  
242 *ADH2* (*HOT5*) and the putative ADH At4g22110 showed DAS features that were mostly  
243 repressed upon Fe starvation. By contrast, in shoots *ADH1* carried chiefly enhanced DIR  
244 features (Fig. 5b). Determination of *ADH1* transcript levels in roots by RT-qPCR revealed a  
245 steep increase after two days of Fe deficiency (Supplementary Fig. S4), matching  
246 transcriptomic studies carried out at later stages on roots of Fe-deficient plants<sup>7,44</sup>. These data  
247 suggest that the ADH-mediated fermentation route is supported in roots, but not in shoots of  
248 Fe-deficient plants.

249 An alternative fate of acetaldehyde is the conversion to acetic acid, catalysed by a  
250 group of aldehydedehydrogenases (ALDHs) in a reaction yielding NADH. In shoots, three

251 NAD-dependent ALDHs (the mitochondrial family 2 proteins ALDH2B7 and ALDH2B4,  
252 and the cytoplasmatic family 3 protein ALDH3H1) showed reduced IR upon Fe starvation  
253 (Fig. 5b). In roots, *ALDH2B7* transcripts carried enhanced IR at two time points after the  
254 onset of Fe-deficient conditions (Fig. 5a), indicating repressed acetic acid formation. It thus  
255 appears that different fermentation routes are engaged in roots and shoots, possibly driven by  
256 differences in redox regulation and energy status of leaf and root cells.

257 Besides reduced PK activity, the build-up of toxic pyruvate concentrations in roots of  
258 Fe-deficient plants is circumvented by rapid metabolism of its precursor, PEP. PEP is a  
259 potent inhibitor of PFK activity and, if present at high levels, decreases glycolysis rates<sup>45-47</sup>.  
260 Increased  $\beta$ -carboxylation of PEP via PEP carboxylase (PPC) in roots is a hallmark of Fe-  
261 deficient roots of strategy I plants<sup>17</sup>. In roots, *PPC1* transcripts carried reduced IR features  
262 (Fig. 5a), transcription of the gene was induced at later stages of Fe deficiency<sup>7</sup>. The reverse  
263 reaction, the conversion of oxaloacetate to PEP by PEP carboxykinase (PCK), showed  
264 enhanced IR (Fig. 5a,b). In concert with these results, *PCK1* was found to be downregulated  
265 in roots (but not in shoots) of plants subjected to Fe deficiency for three days<sup>7,48</sup>.

266

### 267 **DE and DAS concertedly regulate the ferrome**

268 Strikingly, the vast majority of DAS-regulated genes did not change significantly in  
269 expression over the experimental period. In total, less than 1% of the DAS genes were also  
270 differentially expressed (Fig. S1e). Plotting fold-changes of the different DAS types versus  
271 DE revealed a moderate correlation between DIR and DE (Fig. 6a). By contrast, regulation of  
272 gene activity by DDA and DE was almost mutually exclusive (Fig. 6b).

273 The principle of mutual exclusivity does not seem to apply when only genes that were  
274 shown to robustly respond to Fe deficiency at the transcriptional level in previous studies are  
275 considered, a subset that has been referred to as the ‘ferrome’<sup>49</sup>. To revise and update this

276 definition, we surveyed recent public transcriptomic datasets of Fe-deficient plants derived  
277 from RNA-seq profiling studies. For roots, seven datasets were analysed, and genes that were  
278 found to be differentially expressed in at least four of these studies (three out of five in shoots)  
279 were included in the Arabidopsis ferrome. This procedure yielded subsets of 108 and 100  
280 genes in roots and shoots, respectively; a suite of 39 genes was robustly differentially  
281 expressed in both roots and shoots (Supplementary Table S6). From 114 DE-regulated  
282 ferrome genes, a subsection of 42 (37%) was additionally regulated by DAS (Supplementary  
283 Table S2), a percentage that is substantially higher than the average of 3-5% observed in  
284 roots at the different sampling points. Most of the genes involved in Fe uptake were  
285 transcriptionally regulated; however, some regulators (e.g., *GRF11*, *BSTL2*), genes encoding  
286 enzymes such as the  $\beta$ -glucosidase *BGLU42* which is critical for the deglycosylation of  
287 coumarins prior to secretion<sup>50</sup>, and the Zn/Fe transporter *IRT3*, were exclusively regulated by  
288 DAS. All of these genes were shown to be transcriptionally induced at later stages of Fe  
289 deficiency (Supplementary Table S2).

290         Unexpectedly, in both roots and shoots the percentage of DE-regulated ferrome genes  
291 increased over time. While after 0.5 hours the majority of Fe-responsive genes was DAS-  
292 regulated, the proportions of DE and DAS were about equal at 6 hours and massively shifted  
293 towards transcriptional regulation at 12 hours (Fig. 7a, b). A comparison with a previous  
294 survey of genes responsive to a 3-day-period of Fe starvation revealed a steep decrease in the  
295 percentage of DAS-regulated genes at later stages of Fe deficiency (Fig. 7b). Comparing  
296 different subgroups within the ferrome showed that transcripts encoding enzymes tended to  
297 have a higher percentage of DAS than transporters and regulators. After 3 days,  
298 transcriptional regulation of metabolic genes was still lower than in the other categories, but  
299 the participation of DAS in the overall gene regulation was dramatically reduced to about  
300 relative to what was observed in the short term (Fig. 7b). Such decreased participation of

301 DAS in the regulation of Fe homeostasis was also observed when other gene ontologies were  
302 considered (Fig. 7c). This analysis also revealed that at later stages of Fe deficiency  
303 transcriptional regulation of ferrome genes is prioritized over other processes, indicating that  
304 a more severely disturbed Fe metabolism prioritises expression of a specific subset of genes  
305 to secure efficient Fe acquisition. It may also be assumed that at this stage, early DAS events  
306 have been established as stable changes in protein abundance, which is not monitored in the  
307 two transcriptomic studies considered here.

308

### 309 **Gene architecture predefines the type of gene regulation**

310 From the survey of Fe-responsive genes, it appears that the various Fe-responsive processes  
311 are preferentially controlled by either DE (e.g., JA-biosynthesis and signalling), DAS  
312 (glycolysis and TCA cycle), or both DE and DAS (Fe uptake), regulatory patterns that are  
313 possibly associated with the amplitude of the response (Supplementary Tables S2-5). To  
314 investigate whether genomic traits influence or govern the type of gene regulation, we first  
315 analysed the number and length of introns of Fe-responsive genes. Intron length was only  
316 moderately correlated with the probability of IR. Introns with a length of more than 200 bp  
317 had a slightly higher chance of being retained upon Fe deficiency than shorter introns,  
318 reaching a peak at about 700 bp (Supplementary Fig. S2a). The number of introns, on the  
319 other hand, appeared to be a strong predictor for AS. When normalized to the average intron  
320 number across the genome, the number of genes producing transcripts with DIR, DDA, or  
321 DES features showed a steep incline which saturated at an intron number between 10 and 20  
322 (Supplementary Fig. S2b, c). Notably, intron-rich genes harbouring >50 introns were rarely  
323 found to be subject to DAS (Supplementary Fig. S2b, c).

324 As further parameters that presumptively affect the type of gene regulation, we  
325 investigated the influence of 5' and 3' splice site strength, promoter length, and the number

326 of transcription factor binding sites (TFBSs) on DE and DAS. Plotting the minimum average  
327 splice site strength [ASS;  $(\min 5' + \min 3')/2$ ] of Fe-responsive genes against the intron  
328 number showed that weak splice sites were generally associated with lower intron numbers  
329 (Fig. 8a-c), a finding that may be causal rather than merely correlative. Considering DE- and  
330 DAS-regulated genes separately revealed that the average intron number was much lower in  
331 DE than in DAS genes, while ASS appears to be biased towards higher values (i.e., stronger  
332 splice sites) in this group relative to DAS-regulated genes. With few exceptions, genes with  
333 intron numbers  $>20$  were regulated by DAS (Fig. 8b). However, highly negative ASS values  
334 do not appear to compromise transcriptional regulation, indicating that DE can be  
335 promiscuously employed to regulate genes hardwired for being DAS-regulated. Factors that  
336 may support transcriptional regulation such as promoter length and the number of  
337 transcription factor binding sites (TFBSs) did not pose major effects on gene expression.  
338 While promoter length was correlated with the number of TFBSs, no bias towards higher  
339 values was observed for DE-regulated genes, suggesting that these parameters are not  
340 decisive for the type of regulation (Fig. 8c, d). It thus appears that DE is not dictated by  
341 genomic features and can be called into play when more robust regulation is required.

342

### 343 **The type of gene regulation is genomically hardwired across biological process**

344 To further investigate the mechanisms underlying the regulation of Fe-responsive genes, we  
345 compared the genetic architecture of genes involved in various processes that are affected by  
346 the Fe regime. Homing in on individual genes of the ferrrome, a comparison of the DE- and  
347 DAS-regulated subsets supported the trend observed for all Fe-responsive genes, i.e., a  
348 marked shift towards stronger splice sites for DE-regulated genes (Fig. 9). However,  
349 regulation by DE was also observed for genes with very weak (i.e., highly negative) splice  
350 sites and high intron numbers (Fig. 9a). The difference in ASS between DE- and DAS-

351 regulated genes was obvious at all experimental time points, and was independent of the plant  
352 part under study (i.e., roots vs. shoots) and the direction of regulation (Supplementary Fig.  
353 S3).

354 In addition to the ferrome, Fe-responsive genes involved in glycolysis (75 out of a  
355 total of 133), the TCA cycle (34/63), JA-signalling (25/36), transcriptional regulation  
356 (432/1717), and pre-mRNA splicing (163/396) were analysed. This comparison revealed  
357 pronounced differences in splice site strength and intron number among the various groups  
358 that appear to be typical of a particular process. When compared with all Fe-responsive  
359 entities ( $n = 9,190$ ), genes from the ferrome group, JA-related genes, and genes encoding  
360 transcription factors showed a lower-than-average number of introns and a higher-than-  
361 average ASS, while genes related to glycolysis, the TCA cycle, and splicing-related genes  
362 exhibited an opposite pattern (Fig. 10).

363 Separating exclusively DE- or DAS-regulated genes revealed pronounced differences  
364 between the two groups, with DE-regulated genes exhibiting much stronger splice sites and  
365 lower intron numbers (Fig. 8b). Strikingly, DAS-regulated transcription factors harbour  
366 features of DE-controlled genes, possibly reflecting an evolutionary trend of this group  
367 towards this type of regulation. It is further interesting to note that – while containing  
368 transcription factors and metabolic genes to almost equal portions – ferrome genes behaved  
369 similar to genes encoding transcription factors, suggesting that the massive changes in  
370 abundance in response to environmental cues necessitates this type of regulation in most  
371 genes in these two groups to allow for an adequate and efficient response to environmental  
372 cues.

373 Although promoter length and the number of TFBSs do not seem to affect the mode  
374 of gene regulation, these parameters can be supportive to or even critical for gene expression.  
375 For example, in yeast, promoters of stress-responsive genes were found to be longer than

376 those of housekeeping genes<sup>51</sup>, suggesting that such responsiveness requires a more elaborate  
377 interaction between *trans*-acting factors and *cis*-regulatory elements. In the present study, the  
378 average promoter length (1,595 bp) and the average number of TFBSs (33.5) of all 9,190 Fe-  
379 responsive genes were not significantly different from those determined for genes of the  
380 categories ferrome, glycolysis, and TCA cycle, but slightly higher (38.1) for genes encoding  
381 transcription factors (Fig. 9). Crucially, splicing-related genes had on average significantly  
382 shorter promoters (1,290 bp) and less TFBSs (27.5), indicating a trend against regulation by  
383 DE of these genes. Another deviation from the overall average was observed for JA-related  
384 genes, which had longer promoters and more TFBSs (Fig. 11). The promoter architecture of  
385 JA-related genes may reflect the extent of recruitment by different signalling pathways. For  
386 example, genes encoding enzymes mediating the first steps of JA synthesis (i.e., *LOX2*,  
387 *LOX3*, *LOX4*, *AOS*, and *AOC3*) had an average promoter length of 2,764 bp and 63.6 TFBSs,  
388 almost twice of the average of Fe-responsive genes. JA synthesis is important for a plenitude  
389 of processes, which is possibly mirrored by a large number of regulatory *cis*-consensus  
390 motifs on the promoters of these genes. By contrast, clade Ib bHLH proteins, which are  
391 highly responsive to the Fe regime but have not been associated with other responses, have  
392 short promoters (on average 918 bp) and relatively few TFBSs (24.5). Collectively, the data  
393 suggest that a particular process is prone to a certain type of gene regulation, which is, by an  
394 appreciable extent, hardwired by the structure of the genes involved in this process.

395

## 396 **Discussion**

### 397 **Multi-layered gene control orchestrates the acclimation to Fe deficiency**

398 The current survey shows that short-term exposure to Fe deficiency is sufficient to trigger  
399 profound changes in mRNA abundance and AS patterns, inducing a series of responses that  
400 act in concert to recalibrate cellular Fe homeostasis. These responses comprise alterations in



401 transport processes, secondary metabolism, redox and pH balance, hormone signalling, and  
402 central carbon metabolism, and are simultaneously induced in roots and shoots. A less well-  
403 explored component Fe deficiency response is the sharply timed induction of JA biosynthesis.  
404 Similar to what we describe here for the strategy I plants Arabidopsis, short-term activation  
405 of JA biosynthesis was reported for the strategy II plant rice<sup>52</sup>, suggesting that expression of  
406 JA-related genes constitutes a general, conserved mechanism across land plants. The reasons  
407 for this transient upregulation of JA synthesis are yet to be elucidated. Activation of JA  
408 signalling by exogenously supplied methyl JA was shown to affect the assembly of the  
409 microbial community in the rhizosphere, possibly by altering the composition of root  
410 exudates<sup>53</sup>. In addition, JA determines the compatibility between host and beneficial  
411 microbes<sup>54,55</sup>, which, in turn, may positively affect coumarin-mediated Fe uptake<sup>56</sup>. An  
412 alternative explanation can be inferred from a study on Arabidopsis plants exposed to  
413 oxygen deficiency. Here, a similar boost in JA production was observed in roots after a 6-  
414 hour period of oxygen depletion and suggested to trigger repression of root meristem  
415 regulators to avoid energy exhaustion when respiration is compromised<sup>57</sup>, a scenario which  
416 may also apply to Fe-deficient plants.

417 An underappreciated response to Fe deficiency is the reprogramming of large parts of  
418 the central carbon metabolism to counteract imbalances resulting from reduced respiration,  
419 decreased activity of Fe-containing enzymes, and shifts in intracellular redox and pH  
420 homeostasis. Rerouting central carbon metabolism to prioritize Fe uptake under conditions of  
421 Fe deficiency was observed in soil bacteria<sup>58</sup> and eukaryotic systems such as human  
422 macrophages<sup>59</sup> and yeast<sup>15,60,61</sup>, suggesting that alterations in primary metabolism represent a  
423 conserved concept across organisms. Notably, the priority for anaerobic glycolysis, inhibition  
424 of PK activity, and the truncated TCA cycle observed in Fe-deficient plant cell resembles the  
425 metabolism of cancer cells<sup>62</sup>, further underlining the plasticity of central carbon metabolism

426 and its role in the adaptation to a given set of conditions. Since many of the observed  
427 perturbations such as, for example, the accumulation of pyruvate or citrate are undetectable  
428 or at least not pronounced within the first 12 hours of Fe deficiency, it can be assumed that  
429 alterations in gene activity occur both in response to and in anticipation of imbalances caused  
430 by discontinued Fe supply.

431

### 432 **Pyruvate is a central player in the metabolic homeostasis of Fe-deficient plants**

433 High pyruvate levels stimulate respiration<sup>63</sup>, a situation which is not desirable under  
434 conditions of Fe-deficiency. In roots of Fe-deficient plants, prevention of such build-up is  
435 attempted by inhibition of PK and induction of ADH. ADH transcript and protein levels were  
436 found to increase in Fe-deficient roots of various species<sup>7,23,42,44,64,65</sup>, suggesting that ethanol  
437 fermentation is a common feature of the Fe deficiency response. In shoots, however, acetic  
438 acid is a more likely product of anaerobic respiration. The different fate of pyruvate in root  
439 and leaf cells may be associated with different redox status of root and leaf cells. In roots,  
440 reduction of acetaldehyde to ethanol restores the NAD<sup>+</sup> pool to maintain high glycolysis  
441 rates<sup>66</sup>. In Fe-deficient leaf cells, acetate synthesis may recalibrate redox homeostasis, a  
442 scenario which was suggested to constitute a critical component of a survival strategy  
443 triggered by drought stress and possibly other environmental changes<sup>67-69</sup>. In this strategy,  
444 acetate formation via ALDH2B7 is crucial in counteracting oxidative stress by stimulating  
445 COII-dependent jasmonate signalling and subsequent induction of JA-responsive genes<sup>69</sup>.

446 Another peculiarity associated with the metabolism of Fe-deficient root cells is related  
447 to the massively increased export of protons, which necessitates strategies to replenish  
448 substrate for the H<sup>+</sup>-ATPases and to prevent excessive alkalisation of the cytosol. The  
449 concentration of free cytosolic H<sup>+</sup> is in the sub-micromolar range<sup>70</sup> and insufficient to support  
450 the high proton fluxes of Fe-deficient root cells. Such compensatory release of protons is

451 achieved by PPC-mediated carboxylation of PEP or, more precisely, the preceding formation  
452 of  $\text{HCO}_3^-$  by carbonic anhydrase, which is accompanied by a net production of protons (Fig.  
453 11). The product of PEP carboxylation, OAA, was not detectable in roots, indicative of its  
454 rapid metabolization to citrate, the level of which was dramatically increased upon Fe  
455 starvation. Citrate accumulation in roots of Fe-deficient has been reported for a variety of  
456 species with high proton extrusion capacity such as tomato<sup>16</sup>, cucumber<sup>71,72</sup>, sugar beet<sup>73</sup>, and  
457 *Capsicum annuum*<sup>74</sup>, implying a link between these two observations. Moreover, citrate  
458 levels appear to correlate with PPC activity<sup>75</sup>, making it tempting to speculate that increased  
459 proton secretion and subsequent PEP carboxylation are the driving forces for citrate  
460 accumulation in Fe-deficient roots. In Arabidopsis, PPC1 was found to be induced in  
461 proteomic<sup>43</sup> and transcriptomic surveys of Fe-deficient roots<sup>7,9,43,76,77</sup>. Moreover,  
462 transcriptional induction of PEP carboxylase kinase (*PPCK1*)<sup>7,9,77,78</sup>, as well as  
463 phosphorylation of PPC1 was observed in Fe-deficient roots<sup>23</sup>, indicating multi-layered and  
464 robust regulation of PEP carboxylation in roots upon Fe starvation. It can thus be assumed  
465 that citrate accumulation is caused by increased production of OAA via PEP carboxylation  
466 and limited metabolization of citrate due to compromised activity of the Fe-sulphur proteins  
467 aconitase and succinate dehydrogenase, compromising the completion of the TCA cycle. In  
468 Arabidopsis, ATPase-mediated proton export is regulated by FIT<sup>79</sup>, which would imply that  
469 citrate accumulation is also dependent on functional FIT protein. In line with this concept, no  
470 increased citrate levels upon Fe deficiency were observed in *fit* mutants<sup>80</sup>. Taken together,  
471 these data imply that, with a few exceptions where such changes are induced at the level of  
472 transcription (e.g., *PFK*, *PK*, *ADH*, and *PPC*), DAS appears to represent the main regulon of  
473 central carbon metabolism, in particular at early stages of Fe deficiency. This pattern differs  
474 from that observed for genes encoding enzymes involved in the production of Fe-mobilizing  
475 coumarins, which massively change in abundance both at the transcript and protein levels

476 (this study)<sup>23,81</sup>. Thus, metabolic processes are not necessarily associated with DAS  
477 regulation; it rather appears that the amplitude and specificity of the response (i.e., the direct  
478 involvement in Fe uptake) determine the mode of gene regulation.

479

#### 480 **Transcription is biased by but not dependent on genomic features**

481 A recent analysis of a suite of AS datasets derived from various eukaryote systems revealed  
482 that in addition to or in conjunction with splicing factors, genomic traits may determine the  
483 propensity of the mode by which a gene is regulated, suggesting that such features hardwire  
484 genes to be controlled by either transcription or alternative splicing<sup>30</sup>. In support of this  
485 conception, we show here that in particular the number of introns and the strength of the  
486 splicing sites influence the probability of a gene to undergo AS. In contrast to DAS,  
487 transcriptional regulation does not appear to be dependent on genomic features. While  
488 exclusively DE-regulated genes are strongly biased towards low intron numbers and high  
489 splice site strengths, these traits are rather compromising DAS regulation than representing a  
490 prerequisite for transcriptional regulation. Transcription appears to be promiscuously  
491 employed when pronounced changes in gene activity are required. A representative example  
492 is *PFKI*, which, despite having the architecture typical of DAS-regulated genes and being  
493 part of a chiefly DAS-regulated process, is robustly controlled by transcription. It should be  
494 noted, however, that transcription-promoting features such as the number of TFBSs may bias  
495 the mode of gene regulation towards, or, as in the case of splicing factors, against regulation  
496 by DE. The generally observed mutual exclusivity of DE and DAS was not evident in  
497 ferrome genes, suggesting that the rapid and highly dynamic responses to the availability of  
498 Fe requires a more complex regulation to avoid extreme depletion of or sudden overload with  
499 Fe. Thus, under a certain set of conditions, the two mechanisms appear to collaborate to

500 regulate gene activity. Mostly, but not always, such cooperative regulation occurs anti-  
501 directionally, suggesting that DAS is fine-tuning translation efficiency.

502

### 503 **Conclusions**

504 Collectively, our data show that DE and DAS are co-operative mechanisms that jointly, but  
505 mostly autonomously, govern gene activity in a precisely timed pattern in response to  
506 environmental signals. The current survey further revealed components of the Fe deficiency  
507 response that are either not evident under steady-state conditions (i.e., JA signalling), or not  
508 sufficiently mirrored at the transcript level and thus underappreciated in transcriptomic  
509 studies (i.e., alterations in pyruvate metabolism). Our data further show that DAS events  
510 triggered by short-term exposure to Fe starvation are in large part congruent with  
511 observations derived from proteomic, physiological, and metabolic studies conducted at later  
512 stages of Fe deficiency, forerunning subsequent alterations in protein abundance and enzyme  
513 activity. AS appears to represent an area of largely unexplored ‘dark matter’, controlling  
514 putatively important responses that may significantly contribute to the pronounced  
515 discordance of mRNA and protein expression, a gap that is particularly wide in plants<sup>82</sup>. Thus,  
516 DAS can be considered as a major contributor of such discordance and a putative proxy for  
517 more robust metabolic or physiological changes. A surprising finding was the strong bias  
518 towards the mode of gene regulation posed by genomic features. It seems reasonable to  
519 speculate that particular processes are more efficiently regulated by either regulatory mode,  
520 depending on the function of the genes and the amplitude of the alterations in gene activity  
521 required for adequate acclimation to adverse environmental conditions.

522

### 523 **Materials and Methods**

#### 524 **Plant Growth**

525 Seeds of *Arabidopsis thaliana* (L.) Heynh accession Columbia (Col-0) were  
526 obtained from the Arabidopsis Biological Resource Center (Ohio State University). Plants  
527 were grown hydroponically in a nutrient solution composed of 5 mM KNO<sub>3</sub>, 2 mM Ca(NO<sub>3</sub>)<sub>2</sub>,  
528 2 mM MgSO<sub>4</sub>, 2.5 mM KH<sub>2</sub>PO<sub>4</sub>, 14 μM MnCl<sub>2</sub>, 70 μM H<sub>3</sub>BO<sub>3</sub>, 1 μM ZnSO<sub>4</sub>, 0.5 μM CuSO<sub>4</sub>,  
529 0.2 μM Na<sub>2</sub>MoO<sub>4</sub>, 0.01 μM CoCl<sub>2</sub>, 40 μM Fe-EDTA, and 4.7 mM MES buffer (pH 5.5).  
530 Seeds were infiltrated with distilled H<sub>2</sub>O for 3 days in dark in 4°C before being transferred to  
531 the hydroponic system and then grown in a growth chamber at 21°C under continuous  
532 illumination (70 μmol m<sup>-2</sup> s<sup>-1</sup>). After 16 d of pre-cultivation, plants were transferred to fresh  
533 nutrient solution with either 40 μM Fe-EDTA (+Fe plants for control) or no Fe with 100 μM  
534 3-(2-pyridyl)-5,6-diphenyl-1,2,4-triazine sulfonate (-Fe plants) for 0.5-, 6-, and 12-hours  
535 treatment for RNA-seq analysis, and 1-3 days -Fe treatment for further RT-qPCR  
536 experiments or Ultra-High Performance Liquid Chromatography (UHPLC) analysis. At the  
537 end of the treatment, root and shoot were collected and stored at -80°C.

538

### 539 **RNA-seq and definition of DEGs**

540 Total RNA was extracted from approximately 100 mg of *Arabidopsis* roots or shoots using  
541 the RNeasy Plant Mini Kit (Qiagen, Cat. No. 74904). RNA samples were treated with  
542 DNaseI (Qiagen, Cat. No. 79254) to remove DNA. RNA concentration was determined with  
543 a NanoDrop ND-1000 UV-Vis spectrophotometer (NanoDrop Technologies). For preparing  
544 RNA-seq libraries, mRNA molecules with poly-A tails were purified using poly-T oligo-  
545 attached magnetic beads.

546 The first-strand cDNA was synthesized by the use of dNTP (dUTP replaced by dTTP), buffer,  
547 RNaseH, and DNA polymerase I. cDNA was purified using a Purification Kit (Qiagen)  
548 followed by performing end repair and A-tailing. The sample was then treated with  
549 USERTM (Uracil-Specific Excision Reagent) enzyme to digest the antisense strand DNA

550 follow by PCR reaction. After these procedures, the library could be sequenced using the  
551 Illumina HiSeq 4000 platform. The first step in the trim process was the conversion of the  
552 quality score (Q) to error probability. Next, for every base a new value was calculated;  $0.05 -$   
553 error probability. This value is negative for low quality bases, where the error probability is  
554 high. For every base, we calculated the running sum of this value. If the sum dropped below  
555 zero, it was set to zero. The part of the sequence to be retained is between the first positive  
556 value of the running sum and the highest value of the running sum. Everything before and  
557 after this region was trimmed off. In addition, reads shorter than 35 bp were discarded. A  
558 total of 66 to 87 million reads were obtained from Illumina sequencing for the various  
559 libraries (Supplementary Table S1). Reads were aligned to the TAIR10 transcriptome using  
560 Bowtie2<sup>83</sup>, and only alignments of read pairs that mapped to the same transcripts were  
561 accepted. The remaining reads were mapped to the TAIR10 genome directly using the BLAT  
562 program<sup>84</sup> with default parameters. Alignments with a minimum 95% identity for each read  
563 were considered for mapping but only the alignment with the highest identity were accepted.  
564 Read counts were computed using the RACKJ software package  
565 (<http://rackj.sourceforge.net/>), normalized using the Trimmed Mean of M-values (TMM)  
566 method<sup>85</sup>, and transformed into log-count-per-million (logCPM) using the voom method<sup>86</sup>.  
567 Adjusted RPKM values (Reads Per Kilobase of exon Model per million mapped reads<sup>87</sup>)  
568 were computed based on logCPMs and gene model lengths. For two given samples, the  
569 RPKM values of the genes was compared using *t*-tests, and a gene was identified as  
570 differentially expressed if the corresponding *P* value was less than or equal to 0.05 and the  
571 fold-change was greater than 2 at each time point. Only genes with relevant expression levels  
572 (RPKM > the square root of the mean expression value of the whole dataset) were considered.

573

574 **Alternative splicing analysis**

575 Alternative splicing events were identified as described previously<sup>88</sup> using the RACKJ  
576 software. Three types of alternative splicing were considered, IR, DA, and ES. For detecting  
577 IR events, the IR ratio was computed as the average read depth of its intron divided by the  
578 average read depth of the neighboring exons, and the IR ratios of three -Fe replicates were  
579 compared to those of the controls (+Fe) using *t*-test. Similarly, to detect alternative  
580 donor/acceptor or exon skipping events, signals representing AS events (read counts skipping  
581 exons, and read counts covering the same splicing junctions) were divided by gene  
582 expression levels as background. *T*-tests were performed on the obtained ratios to compare  
583 samples from treated plants against control samples. Changes of relative expression levels of  
584 AS events were inferred using a *t*-test P value < 0.05 with a fold-change > 2.

585

#### 586 **RT-qPCR**

587 Samples were frozen in liquid nitrogen at the end of the experimental period and stored at -  
588 80°C. Total RNA was extracted using the RNeasy Mini Kit (Qiagen) and treated with DNase  
589 using the TURBO DNA-free kit (Ambion). Three µg of total RNA per sample was used for  
590 obtaining cDNAs. First-strand cDNA was synthesized using oligo(dT) primer and the  
591 Superscript<sup>TM</sup> III First-Strand Synthesis System (Invitrogen, Cat. No. 18080) for RT-qPCR.  
592 The resulting single-stranded complementary cDNAs were then used as a template in real-  
593 time RT-PCR assay. RT-qPCRs were carried out with gene-specific primers listed in Table  
594 S6, and SYBR<sup>TM</sup> Green PCR Master Mix (Applied Biosystems, Cat. No. 4367659) according  
595 to the manufacturer's instructions using a QuantStudio 12K Flex Real-Time PCR System.  
596 Three independent replicates were performed for each sample. The  $\Delta\Delta C_T$  method was used to  
597 determine the relative gene expression<sup>89</sup>, with the expression of elongation factor 1 alpha  
598 (EF1 $\alpha$ ; At5g60390) used as an internal control.

599



600 **Genomic analyses**

601 Five' and 3' splicing site strength scores and event information were downloaded from the  
602 PastDB database<sup>30</sup>. An inhouse Perl script was developed to associate AS events of PastDB  
603 with the accession number of genes from the TAIR10 annotation. The information on  
604 transcription factor binding sites and promoter lengths was downloaded from the *Arabidopsis*  
605 *thaliana cis*-regulatory database (AtcisDB) database on the Arabidopsis Gene Regulatory  
606 Information Server (AGRIS)<sup>90</sup>.

607

608 **UHPLC-MS analysis**

609 Approximately 100 mg plant tissues were harvested, extracted in 1.5 ml of a solution of 375  
610  $\mu$ l dH<sub>2</sub>O, 750  $\mu$ l methanol, 375  $\mu$ l chloroform, and an internal standard (Citrate-2,2,4,4-d<sub>4</sub>,  
611 CDN ISOTOPES, Cat. No. 147664-83-3) was added to final concentration of 10  $\mu$ M for each  
612 sample. The supernatant was separated by quick spin-down at 3,000xg, incubated at -20 °C  
613 for 30 min, and centrifugated at 3,000xg for 10 min at 4 °C. Obtained supernatant was mixed  
614 by vortexing with 375  $\mu$ l chloroform of chloroform to remove pigments. Colorless  
615 supernatant was dried in a SpeedVac, resuspended in 50% methanol, and kept under -80 °C.  
616 A Vanquish™ Horizon UHPLC System (Thermo Scientific) coupled to an Orbitrap Fusion  
617 Lumos (Thermo Scientific) mass spectrometer was used for the LC-MS analysis. The  
618 chromatographic separation for samples was carried out on Atlantis Premier BEH C18 AX  
619 VanGuard FIT Column, 1.7  $\mu$ m, 2.1 x 100 mm column (Waters). The column was  
620 maintained at a temperature of 30°C and 1  $\mu$ L sample were injected per run. The mobile  
621 phase A was 2% Acetonitrile 0.1% v/v formic acid in water and mobile phase B was 40% v/v  
622 acetonitrile with 20 mM ammonium formate pH 3.0. The gradient elution with a flow rate  
623 0.4 mL/min was performed with a total analysis time of 11 min. The gradient included 0.5%  
624 B at 0 min, a hold at 0.5% B until 2 min, 99.5% B at 6 min, a hold at 99.5% B until

625 8 min, 0.5% B at 8.5 min, and a hold at 0.5% B until 11 min. General instrumental  
626 conditions were RF lens 60%; sheath gas, auxiliary gas, and sweep gas of 50, 10, and 3  
627 arbitrary units, respectively; ion transfer tube temperature of 325 °C; vaporizer temperature  
628 of 350 °C; and spray voltage of 3500 V for negative mode. For analysis, a full MS scan mode  
629 with a scan range  $m/z$  50 to 400, resolution 30,000, AGC target 4e5 and a maximum injection  
630 time 50 ms was applied. The Xcalibur 4.1 software (Thermo Scientific) was used for the data  
631 processing.

632

### 633 **Acknowledgements**

634 We thank Dr. Yuki Nakamura (IPMB, Academia Sinica) for kindly providing chemicals for  
635 UHPLC standard and Shou-Jen Chou in the Genomic Technology Core Facility at IPMB for  
636 preparing libraries for RNA-seq analysis. We also thank Mei-Jane Fang at the Genomic  
637 Technology Core Facility at the Institute of Plant and Microbial Biology for using of the  
638 QuantStudio 12K Flex Real-Time PCR System, and Yu-Ching Wu for the UHPLC-MS  
639 analysis, which was supported by the Academia Sinica Metabolomics Core Facility at the  
640 Agricultural Biotechnology Research Center of Academia Sinica, supported by Academia  
641 Sinica Core Facility and Innovative Instrument Project (AS-CFII-108-108).

642

### 643 **Author contributions**

644 E.J.H. and W.S. designed the research; E.J.H. performed the experiments; E.J.H., W.D.L.,  
645 and W.S. analysed the data; W.S. and E.J.H., wrote the manuscript.

646

### 647 **Conflict of interest**

648 The authors declare no conflict of interest.

649

650 **Data availability**

651 The RNA-seq data have been deposited at NCBI under the accession number PRJNA759647

652 Reviewer link:

653 [https://dataview.ncbi.nlm.nih.gov/object/PRJNA759647?reviewer=itt5n0](https://dataview.ncbi.nlm.nih.gov/object/PRJNA759647?reviewer=itt5n0pfr6mmqho1akj54r5g2k)  
654 [pfr6mmqho1akj54r5g2k](https://dataview.ncbi.nlm.nih.gov/object/PRJNA759647?reviewer=itt5n0pfr6mmqho1akj54r5g2k)

655

656

**References**

1. Kobayashi, T. *et al.* OsbHLH058 and OsbHLH059 transcription factors positively regulate iron deficiency responses in rice. *Plant Mol. Biol.* **101**, 471-486 (2019).
2. Gao, F. & Dubos, C. Transcriptional integration of plant responses to iron availability. *J. Exp. Bot.* **72**, 2056-2070 (2021).
3. Romheld, V. & Marschner, H. Mechanism of iron uptake by peanut plants: I. FeIII reduction, chelate splitting, and release of phenolics. *Plant Physiol.* **71**, 949-954 (1983).
4. Eide, D., Broderius, M., Fett, J. & Guerinot, M. L. A novel iron-regulated metal transporter from plants identified by functional expression in yeast. *Proc. Natl. Acad. Sci. U.S.A.* **93**, 5624-5628 (1996).
5. Robinson, N. J., Procter, C. M., Connolly, E. L. & Guerinot, M. L. A ferric-chelate reductase for iron uptake from soils. *Nature* **397**, 694-697 (1999).
6. Santi, S. & Schmidt, W. Dissecting iron deficiency-induced proton extrusion in Arabidopsis roots. *New Phytol.* **183**, 1072-1084 (2009).
7. Rodríguez-Celma, J. *et al.* Mutually exclusive alterations in secondary metabolism are critical for the uptake of insoluble iron compounds by Arabidopsis and *Medicago truncatula*. *Plant Physiol.* **162**, 1473-1485 (2013a).
8. Schmid, N. B. *et al.* Feruloyl-CoA 6'-Hydroxylase1-dependent coumarins mediate iron acquisition from alkaline substrates in Arabidopsis. *Plant Physiol.* **164**, 160-172 (2014).
9. Grillet, L., Lan, P., Li, W., Mokkalapati, G. & Schmidt, W. IRON MAN is a ubiquitous family of peptides that control iron transport in plants. *Nat. Plants* **4**, 953-963 (2018).
10. Gao, F., Robe, K., Gaymard, F., Izquierdo, E. & Dubos, C. The transcriptional control of iron homeostasis in plants: a tale of bHLH transcription factors? *Front. Plant Sci.* **10**, 6 (2019).
11. Kim, S. A., LaCroix, I. S., Gerber, S. A. & Guerinot, M. L. The iron deficiency response in Arabidopsis thaliana requires the phosphorylated transcription factor URI. *Proc. Natl. Acad. Sci. U.S.A.* **116**, 24933-24942 (2019).
12. Lei, R. *et al.* bHLH121 functions as a direct link that facilitates the activation of FIT by bHLH IVc transcription factors for maintaining Fe homeostasis in Arabidopsis. *Mol. Plant* **13**, 634-649 (2020).
13. Oexle, H., Gnaiger, E. & Weiss, G. Iron-dependent changes in cellular energy metabolism: influence on citric acid cycle and oxidative phosphorylation. *Biochim. Biophys. Acta Bioenerg.* **1413**, 99-107 (1999).
14. Pereira, M. *et al.* Acute iron deprivation reprograms human macrophage metabolism and reduces inflammation in vivo. *Cell Rep.* **28**, 498-511. e5 (2019).
15. Shakoury-Elizeh, M. *et al.* Metabolic response to iron deficiency in *Saccharomyces cerevisiae*. *J. Biol. Chem.* **285**, 14823-14833 (2010).

16. López-Millán, A. F., Morales, F., Gogorcena, Y., Abadía, A. & Abadía, J. Metabolic responses in iron deficient tomato plants. *J. Plant Physiol.* **166**, 375-384 (2009).
17. Zocchi, G. in *Iron nutrition in plants and rhizospheric microorganisms*. 359-370 (Springer, 2006).
18. Zocchi, G., De Nisi, P., Dell'Orto, M., Espen, L. & Gallina, P. M. Iron deficiency differently affects metabolic responses in soybean roots. *J. Exp. Bot.* **58**, 993-1000 (2007).
19. Rellán-Álvarez, R. *et al.* Identification of a tri-iron (III), tri-citrate complex in the xylem sap of iron-deficient tomato resupplied with iron: new insights into plant iron long-distance transport. *Plant Cell Physiol.* **51**, 91-102 (2010).
20. Mai, H. & Bauer, P. From the proteomic point of view: Integration of adaptive changes to iron deficiency in plants. *Curr. Plant Biol.* **5**, 45-56 (2016).
21. Espen, L., Dell'Orto, M., De Nisi, P. & Zocchi, G. Metabolic responses in cucumber (*Cucumis sativus* L.) roots under Fe-deficiency: a <sup>31</sup>P-nuclear magnetic resonance in-vivo study. *Planta* **210**, 985-992 (2000).
22. Herbig, A. *et al.* Iron and copper nutrition-dependent changes in protein expression in a tomato wild type and the nicotianamine-free mutant *chloronerva*. *Plant Physiol.* **111**, 533-540 (1996).
23. Lan, P. *et al.* iTRAQ protein profile analysis of Arabidopsis roots reveals new aspects critical for iron homeostasis. *Plant Physiol.* **155**, 821-834 (2011).
24. Marquez, Y., Brown, J. W., Simpson, C., Barta, A. & Kalyna, M. Transcriptome survey reveals increased complexity of the alternative splicing landscape in Arabidopsis. *Genome Res.* **22**, 1184-1195 (2012).
25. Reddy, A. S., Rogers, M. F., Richardson, D. N., Hamilton, M. & Ben-Hur, A. Deciphering the plant splicing code: experimental and computational approaches for predicting alternative splicing and splicing regulatory elements. *Front. Plant Sci.* **3**, 18 (2012).
26. Keren, H., Lev-Maor, G. & Ast, G. Alternative splicing and evolution: diversification, exon definition and function. *Nat. Rev. Genet.* **11**, 345-355 (2010).
27. Kalyna, M. *et al.* Alternative splicing and nonsense-mediated decay modulate expression of important regulatory genes in Arabidopsis. *Nucleic Acids Res.* **40**, 2454-2469 (2012).
28. Li, H. *et al.* Histone acetylation associated up-regulation of the cell wall related genes is involved in salt stress induced maize root swelling. *BMC Plant Biol.* **14**, 1-14 (2014).
29. Chaudhary, S., Jabre, I., Reddy, A. S., Staiger, D. & Syed, N. H. Perspective on alternative splicing and proteome complexity in plants. *Trends Plant Sci.* **24**, 496-506 (2019).
30. Martín, G., Márquez, Y., Mantica, F., Duque, P. & Irimia, M. Alternative splicing landscapes in Arabidopsis thaliana across tissues and stress conditions highlight major functional differences with animals. *Genome Biol.* **22**, 1-26 (2021).
31. Fu, X. & Ares, M. Context-dependent control of alternative splicing by RNA-binding proteins. *Nat. Rev. Genet.* **15**, 689-701 (2014).
32. Calixto, C. P. *et al.* Rapid and dynamic alternative splicing impacts the Arabidopsis cold response transcriptome. *Plant Cell* **30**, 1424-1444 (2018).
33. Dikaya, V. *et al.* Insights into the role of alternative splicing in plant temperature response. *J. Exp. Bot.* (2021).
34. Morton, M., AlTamimi, N., Butt, H., Reddy, A. S. & Mahfouz, M. Serine/Arginine-rich protein family of splicing regulators: New approaches to study splice isoform functions. *Plant Sci.* **283**, 127-134 (2019).
35. Laloum, T., Martín, G. & Duque, P. Alternative splicing control of abiotic stress responses. *Trends Plant Sci.* **23**, 140-150 (2018).

36. Luco, R. F., Allo, M., Schor, I. E., Kornblihtt, A. R. & Misteli, T. Epigenetics in alternative pre-mRNA splicing. *Cell* **144**, 16-26 (2011).
37. Pajoro, A., Severing, E., Angenent, G. & Immink, R. Histone H3 lysine 36 methylation affects temperature-induced alternative splicing and flowering in plants. *Genome Biol.* **18**, 1-12 (2017).
38. Jabre, I. *et al.* Differential nucleosome occupancy modulates alternative splicing in *Arabidopsis thaliana*. *New Phytol.* **229**, 1937-1945 (2021).
39. Li, W., Lin, W., Ray, P., Lan, P. & Schmidt, W. Genome-wide detection of condition-sensitive alternative splicing in *Arabidopsis* roots. *Plant Physiol.* **162**, 1750-1763 (2013).
40. Palmer, C. M., Hindt, M. N., Schmidt, H., Clemens, S. & Guerinot, M. L. MYB10 and MYB72 are required for growth under iron-limiting conditions. *PLoS Genet.* **9**, e1003953 (2013).
41. Lan, P., Li, W. & Schmidt, W. Complementary proteome and transcriptome profiling in phosphate-deficient *Arabidopsis* roots reveals multiple levels of gene regulation. *Mol. Cell. Proteomics* **11**, 1156-1166 (2012).
42. Donnini, S. *et al.* Proteomic characterization of iron deficiency responses in *Cucumis sativus* L. roots. *BMC Plant Biol.* **10**, 1-15 (2010).
43. Pan, I. C. *et al.* Post-transcriptional coordination of the *Arabidopsis* iron deficiency response is partially dependent on the E3 Ligases RING DOMAIN LIGASE1 (RGLG1) and RING DOMAIN LIGASE2 (RGLG2). *Mol. Cell. Proteomics* **14**, 2733-2752 (2015).
44. Thimm, O., Essigmann, B., Kloska, S., Altmann, T. & Buckhout, T. J. Response of *Arabidopsis* to iron deficiency stress as revealed by microarray analysis. *Plant Physiol.* **127**, 1030-1043 (2001).
45. Plaxton, W. C. The organization and regulation of plant glycolysis. *Annu. Rev. Plant Biol.* **47**, 185-214 (1996).
46. O'Leary, B. & Plaxton, W. C. Multifaceted functions of post-translational enzyme modifications in the control of plant glycolysis. *Curr. Opin. Plant Biol.* **55**, 28-37 (2020).
47. Plaxton, W. C. & Podestá, F. E. The functional organization and control of plant respiration. *Crit. Rev. Plant Sci.* **25**, 159-198 (2006).
48. Rodríguez-Celma, J. *et al.* The transcriptional response of *Arabidopsis* leaves to Fe deficiency. *Front. Plant Sci.* **4**, 276 (2013).
49. Schmidt, W. & Buckhout, T. J. A hitchhiker's guide to the *Arabidopsis* ferrrome. *Plant Physiol. Biochem.* **49**, 462-470 (2011).
50. Stringlis, I. A. *et al.* MYB72-dependent coumarin exudation shapes root microbiome assembly to promote plant health. *Proc. Natl. Acad. Sci. U.S.A.* **115**, E5213-E5222 (2018).
51. Kristiansson, E., Thorsen, M., Tamás, M. J. & Nerman, O. Evolutionary forces act on promoter length: identification of enriched cis-regulatory elements. *Mol. Biol. Evol.* **26**, 1299-1307 (2009).
52. Kobayashi, T. *et al.* Jasmonate signaling is activated in the very early stages of iron deficiency responses in rice roots. *Plant Mol. Biol.* **91**, 533-547 (2016).
53. Carvalhais, L. C. *et al.* Linking jasmonic acid signaling, root exudates, and rhizosphere microbiomes. *Mol. Plant-Microbe Interact.* **28**, 1049-1058 (2015).
54. Jacobs, S. *et al.* Broad-spectrum suppression of innate immunity is required for colonization of *Arabidopsis* roots by the fungus *Piriformospora indica*. *Plant Physiol.* **156**, 726-740 (2011).
55. Stringlis, I. A., De Jonge, R. & Pieterse, C. M. The age of coumarins in plant-microbe interactions. *Plant Cell Physiol.* **60**, 1405-1419 (2019).
56. Harbort, C. J. *et al.* Root-secreted coumarins and the microbiota interact to improve iron nutrition in *Arabidopsis*. *Cell Host Microbe* **28**, 825-837. e6 (2020).

57. Shukla, V. *et al.* Jasmonate signalling contributes to primary root inhibition upon oxygen deficiency in *Arabidopsis thaliana*. *Plants* **9**, 1046 (2020).
58. Mendonca, C. M. *et al.* Hierarchical routing in carbon metabolism favors iron-scavenging strategy in iron-deficient soil *Pseudomonas* species. *Proc. Natl. Acad. Sci. U.S.A.* **117**, 32358-32369 (2020).
59. Pereira, M. *et al.* Acute iron deprivation reprograms human macrophage metabolism and reduces inflammation *in vivo*. *Cell Reports* **28**, 498-511 (2019).
60. Puig, S., Askeland, E., Thiele, D. J. Coordinated remodeling of cellular metabolism during iron deficiency through targeted mRNA degradation. *Cell* **120**, 99-110 (2005).
61. Chen, Y., Li, F., Mao, J., Chen, Y. & Nielsen, J. Yeast optimizes metal utilization based on metabolic network and enzyme kinetics. *Proc. Natl. Acad. Sci. U.S.A.* **118**, 10.1073/pnas.2020154118 (2021).
62. Dayton, T. L. *et al.* Germline loss of PKM2 promotes metabolic distress and hepatocellular carcinoma. *Genes Dev.* **30**, 1020-1033 (2016).
63. Zabalza, A. *et al.* Regulation of respiration and fermentation to control the plant internal oxygen concentration. *Plant Physiol.* **149**, 1087-1098 (2009).
64. Mai, H. *et al.* Iron and FER-LIKE IRON DEFICIENCY-INDUCED TRANSCRIPTION FACTOR-dependent regulation of proteins and genes in *Arabidopsis thaliana* roots. *Proteomics* **15**, 3030-3047 (2015).
65. Rodríguez-Celma, J. *et al.* Characterization of flavins in roots of Fe-deficient strategy I plants, with a focus on *Medicago truncatula*. *Plant Cell Physiol.* **52**, 2173-2189 (2011).
66. Bui, L. T. *et al.* Conservation of ethanol fermentation and its regulation in land plants. *J. Exp. Bot.* **70**, 1815-1827 (2019).
67. Kursteiner, O., Dupuis, I. & Kuhlemeier, C. The pyruvate decarboxylase1 gene of *Arabidopsis* is required during anoxia but not other environmental stresses. *Plant Physiol.* **132**, 968-978 (2003).
68. Rasheed, S. *et al.* The modulation of acetic acid pathway genes in *Arabidopsis* improves survival under drought stress. *Sci. Rep.* **8**, 1-15 (2018).
69. Kim, J. *et al.* Acetate-mediated novel survival strategy against drought in plants. *Nat. Plants* **3**, 1-7 (2017).
70. Wegner, L. H. *et al.* Biochemical and biophysical pH clamp controlling Net H efflux across the plasma membrane of plant cells. *New Phytol.* **230**, 408-415 (2021).
71. Rabotti, G., De Nisi, P. & Zocchi, G. Metabolic implications in the biochemical responses to iron deficiency in cucumber (*Cucumis sativus* L.) roots. *Plant Physiol.* **107**, 1195-1199 (1995).
72. Nisi, P. D. & Zocchi, G. Phosphoenolpyruvate carboxylase in cucumber (*Cucumis sativus* L.) roots under iron deficiency: activity and kinetic characterization. *J. Exp. Bot.* **51**, 1903-1909 (2000).
73. López-Millán, A. F., Morales, F., Abadía, A. & Abadía, J. Effects of iron deficiency on the composition of the leaf apoplastic fluid and xylem sap in sugar beet. Implications for iron and carbon transport. *Plant Physiol.* **124**, 873-884 (2000).
74. Landsberg, E. Function of rhizodermal transfer cells in the Fe stress response mechanism of *Capsicum annuum* L. *Plant Physiol.* **82**, 511-517 (1986).
75. Abadía, J., López-Millán, A., Rombolà, A. & Abadía, A. Organic acids and Fe deficiency: a review. *Plant Soil* **241**, 75-86 (2002).
76. Dinneny, J. R. *et al.* Cell identity mediates the response of *Arabidopsis* roots to abiotic stress. *Science* **320**, 942-945 (2008).
77. Yang, T. J., Lin, W. & Schmidt, W. Transcriptional profiling of the *Arabidopsis* iron deficiency response reveals conserved transition metal homeostasis networks. *Plant Physiol.* **152**, 2130-2141 (2010).

78. Bailey, K. J., Gray, J. E., Walker, R. P. & Leegood, R. C. Coordinate regulation of phosphoenolpyruvate carboxylase and phosphoenolpyruvate carboxykinase by light and CO<sub>2</sub> during C4 photosynthesis. *Plant Physiol.* **144**, 479-486 (2007).
79. Mai, H., Pateyron, S. & Bauer, P. Iron homeostasis in *Arabidopsis thaliana*: transcriptomic analyses reveal novel FIT-regulated genes, iron deficiency marker genes and functional gene networks. *BMC Plant Biol.* **16**, 1-22 (2016).
80. Chutia, R., Scharfenberg, S., Neumann, S., Abel, S. & Ziegler, J. Modulation of phosphate deficiency-induced metabolic changes by iron availability in *Arabidopsis thaliana*. *Int. J. Mol. Sci.* **22**, 7609 (2021).
81. Tsai, H. *et al.* Scopoletin 8-hydroxylase-mediated fraxetin production is crucial for iron mobilization. *Plant Physiol.* **177**, 194-207 (2018).
82. Vélez-Bermúdez, I. C. & Schmidt, W. The conundrum of discordant protein and mRNA expression. Are plants special? *Front. Plant Sci.* **5**, 619 (2014).
83. Langmead, B. & Salzberg, S. L. Fast gapped-read alignment with Bowtie 2. *Nat. Methods* **9**, 357-359 (2012).
84. Kent, W. J. BLAT--the BLAST-like alignment tool. *Genome Res.* **12**, 656-664 (2002).
85. Robinson, M. D. & Oshlack, A. A scaling normalization method for differential expression analysis of RNA-seq data. *Genome Biol.* **11**, 1-9 (2010).
86. Law, C. W., Chen, Y., Shi, W. & Smyth, G. K. voom: Precision weights unlock linear model analysis tools for RNA-seq read counts. *Genome Biol.* **15**, 1-17 (2014).
87. Mortazavi, A., Williams, B. A., McCue, K., Schaeffer, L. & Wold, B. Mapping and quantifying mammalian transcriptomes by RNA-Seq. *Nat. Methods* **5**, 621-628 (2008).
88. Kanno, T., Lin, W., Chang, C., Matzke, M. & Matzke, A. J. A genetic screen identifies PRP18a, a putative second step splicing factor important for alternative splicing and a normal phenotype in *Arabidopsis thaliana*. *G3* **8**, 1367-1377 (2018).
89. Livak, K. J. & Schmittgen, T. D. Analysis of relative gene expression data using real-time quantitative PCR and the 2- $\Delta\Delta$ CT method. *Methods* **25**, 402-408 (2001).
90. Yilmaz, A. *et al.* AGRIS: the Arabidopsis gene regulatory information server, an update. *Nucleic Acids Res.* **39**, D1118-D1122 (2010).

657 **Figure legends:**

658 **Figure 1.** Differentially expressed genes (DEGs) and differentially alternatively spliced  
659 (DAS) transcripts in response to short-term exposure to Fe deficiency. a) Filters for the  
660 identification and numbers of DEGs at the various experimental time points. b) Venn  
661 diagrams showing the overlaps of DEGs among the different time points. c) Filters for the  
662 identification and numbers of DAS genes. d) Venn diagrams showing the overlaps of DAS  
663 genes among the different time points. e) Venn diagrams showing the overlaps of DIR, DDA,  
664 and DES genes in Fe-deficient roots. f) Venn diagrams showing the overlaps of DEG and

665 DAS genes in roots and shoots of Fe-deficient plants. DIR, differential intron retention; DDA,  
666 differential donor or acceptor sites; DES, differential exon skipping; FC, foldchange.

667

668 **Figure 2.** Functions of Fe-responsive genes in Fe uptake and cellular Fe homeostasis. a-d)  
669 Cartoon showing DEG and DAS genes in roots (upper panels) and shoots (lower panels) after  
670 6 h (a, c) and 12 h Fe (b, d) deficiency. For the transcriptionally regulated genes, the direction  
671 of regulation is indicated by red and blue arrows for up- and down-regulated genes,  
672 respectively. DAS genes are denoted by italics, differentially expressed DAS genes are  
673 indicated by italics and bold letters. The direction of DAS regulation is indicated by red  
674 (enhanced) or blue (reduced) AS. Detailed explanations of gene functions are given in the  
675 text.

676

677 **Figure 3.** Induction of jasmonate biosynthesis, catabolism, and signalling genes in roots in  
678 response to 6 hours Fe deficiency treatment. In plastids, lipid-derived  $\alpha$ -linolenic acid is  
679 converted by LOX, AOS, and AOC into oxophytodienoic acid (OPDA). Following transport  
680 into peroxisomes, OPDA is reduced by OPDA REDUCTASE 3 (OPR3) and converted into  
681 JA by  $\beta$ -oxidation. In the cytoplasm, JA is conjugated with amino acids to JA-Ile by JAR1 or  
682 to MeJA by JMT. In the endoplasmic reticulum, JA-Ile is degraded to 12OH-JA-Ile and  
683 converted to 12-OH-JA via IAR3, ILL5 and ILL6. The latter enzymes can also convert JA-Ile  
684 to JA. In the absence of nuclear JA-Ile, expression of JA responsive genes via MYC2 is  
685 repressed by JAZ. Upon the entry of JA-Ile into the nucleus, JAZ is degraded via the 26S  
686 proteasome and ultimately triggers transcriptional activation of the target genes. Only genes  
687 that were differentially expressed or harboured DAS features in response to Fe starvation are  
688 shown.

689



690 **Figure 4.** Regulation of glycolytic enzymes and their products by Fe-deficiency. a) DAS  
691 regulation of genes encoding glycolytic enzymes in roots. b) Concentrations of glucose-6-  
692 phosphate (G6P), fructose-6-phosphate F6P/glucose-1-phosphate (G1P) (G6P and G1P have  
693 identical retention times and cannot be distinguished from each other), phosphoenolpyruvate  
694 (PEP) and pyruvate in roots and shoots 12 hours and 3 days after transfer to Fe-deplete media.  
695 c-e) qRT-PCR analysis of PFK (c), PK (d; At5g08570) and bHLH38 (e). Asterisks indicate  
696 significant differences from the wild type in each treatment: \*,  $P < 0.05$ ; \*\*,  $P < 0.01$ ; \*\*\*,  $P$   
697  $< 0.001$ . C, control.

698

699 **Figure 5.** Pyruvate metabolism in roots and shoots of Fe-deficient plants. a, b) Fe-responsive  
700 enzymes in roots (a) and shoots (b). Only genes that were differentially expressed or  
701 harboured DAS (DIR or DDA) features in response to Fe starvation are shown. See text for  
702 details.

703

704 **Figure 6.** Correlation between DE and DAS of Fe-responsive genes. a) DE versus DIR. b)  
705 DE versus DDA.

706

707 **Figure 7.** Relative contribution of DE and DAS in the regulation of Fe-responsive genes. a)  
708 Time-course of DE- and DAS-regulated genes in roots and shoots in response to Fe  
709 deficiency. b) DE and DAS regulation in various categories of ferrome genes after short-term  
710 exposure (left panel) and three days after transfer to Fe-deficient conditions (right panel).  
711 Short-term data are pooled from three experimental time points (0.5, 6, and 12 h). Long-term  
712 data are taken from a previous study (Li et al., 2014). c) DE and DAS regulation of genes  
713 involved in various processes after short-term exposure to Fe-deficient conditions. d) DE and  
714 DAS regulation after long-term exposure (3 d) to Fe-deficient conditions.

715

716 **Figure 8.** Correlation of architectural traits of Fe-responsive genes with the mode of gene  
717 regulation. a, b) Intron number (blue bars) and average minimum 5' and 3' splice site (SS)  
718 strength (red bars) of all Fe-responsive genes (a), and DEGs, DAS genes, and genes that are  
719 regulated by both DE and DAS (b). c, d) Correlation between the number of transcription  
720 factor binding sites (TFBSs) and promoter length of all Fe-responsive genes (a), and DEGs,  
721 DAS genes, and genes that are regulated by both DE and DAS (b).

722

723 **Figure 9.** Correlation of architectural traits of individual ferrome gene with the mode of gene  
724 regulation. a-c) Intron number (blue bars) and average minimum 5' and 3' splice site (SS)  
725 strength (red bars) of DEGs (a) DAS genes (b), and genes that are regulated by both DE and  
726 DAS (c).

727

728 **Figure 10.** Genomic features of Fe-responsive genes involved in various processes. a)  
729 Average minimum strengths of 5' and 3' splice sites. b) Intron number. c) Transcription  
730 factor binding sites (TFBSs). d) Promoter length. Box plot shows the median (line) and the  
731 average (x) for genes in roots (a) and shoots (b). Significant differences were detected using  
732 two-way ANOVA with Tukey's multiple comparison test,  $P < 0.001$ .

733

734 **Figure 11.** Summary of the changes in central carbon metabolism in roots of Fe deficient  
735 plants. Carbon flux through the glycolytic pathway is increased by transcriptional  
736 upregulation of *PFK1*. Pyruvate accumulation caused by a truncated TCA cycle is avoided by  
737 downregulation of PK activity by DAS and DE and increased ethanolic respiration via PDC1  
738 and ADH1, which are regulated by DAS and DE. This reaction regenerates the  $\text{NAD}^+$  pool  
739 for continued glycolytic flux. Acetate respiration, which is prioritized in shoots, is repressed

740 by DAS of *ALDH7B4*. Increased net proton secretion by P-type ATPases is counteracted by  
741 the formation of  $\text{HCO}_3^-$  and subsequent carboxylation of phosphoenolpyruvate (PEP),  
742 yielding oxaloacetate (OAA), which is converted to citrate. DAS genes are denoted by italics,  
743 genes regulated by both DE and DAS are indicated by italics and bold letters. Enzymes that  
744 are not differentially expressed are depicted in grey. The direction of DAS regulation is  
745 indicated in red (enhanced) or blue (reduced) letters.

a

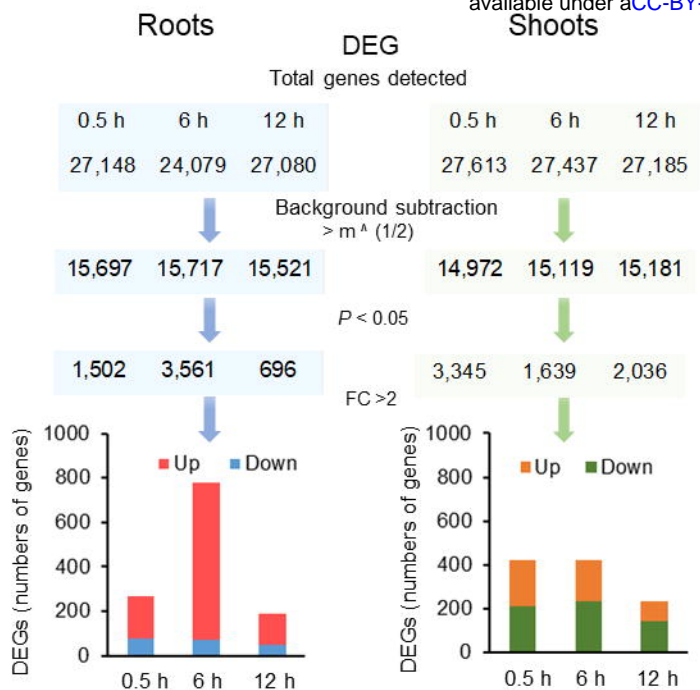

b

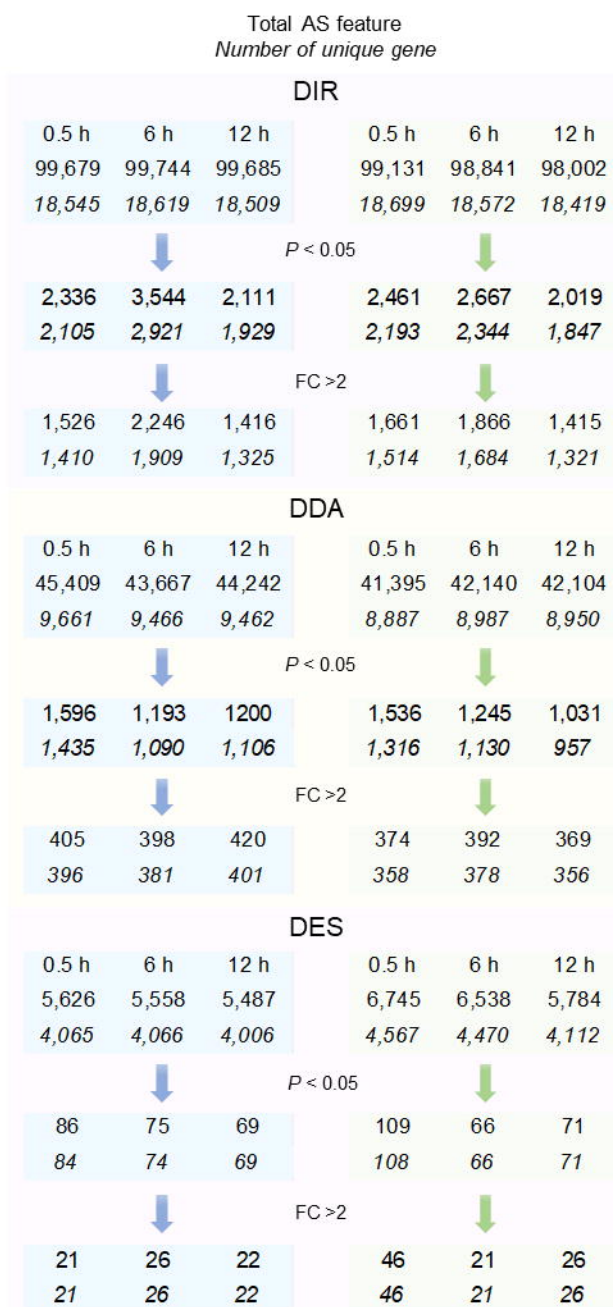

d

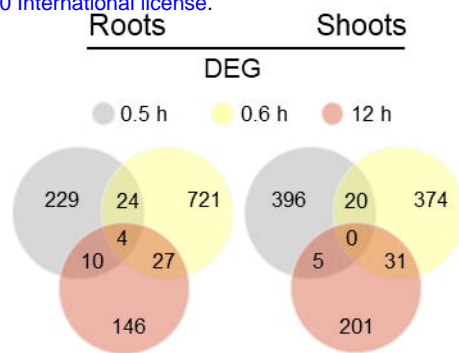

e

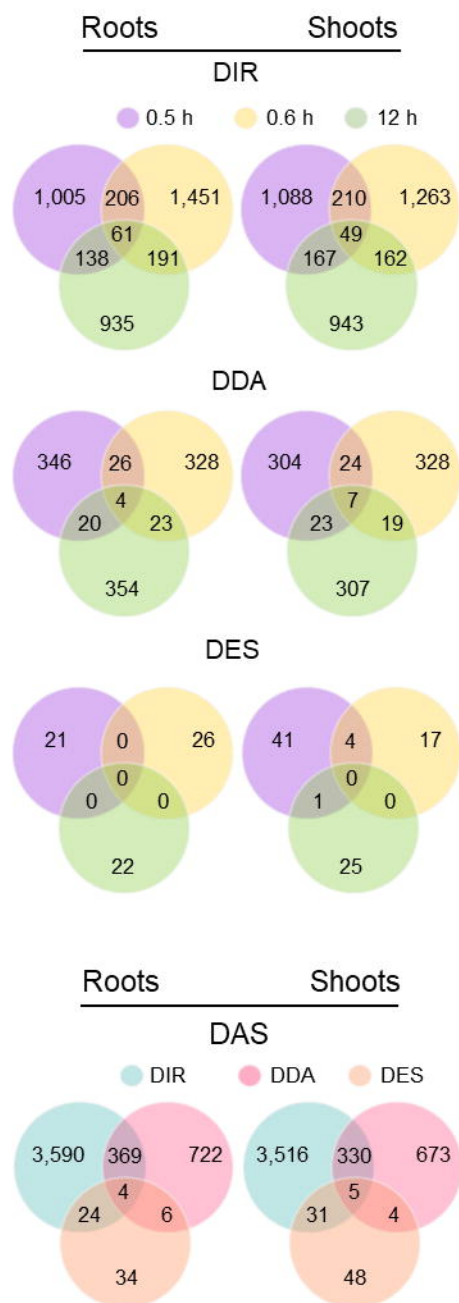

f

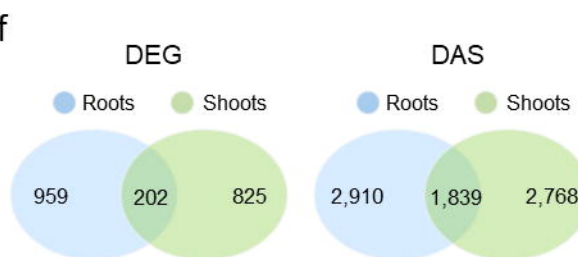

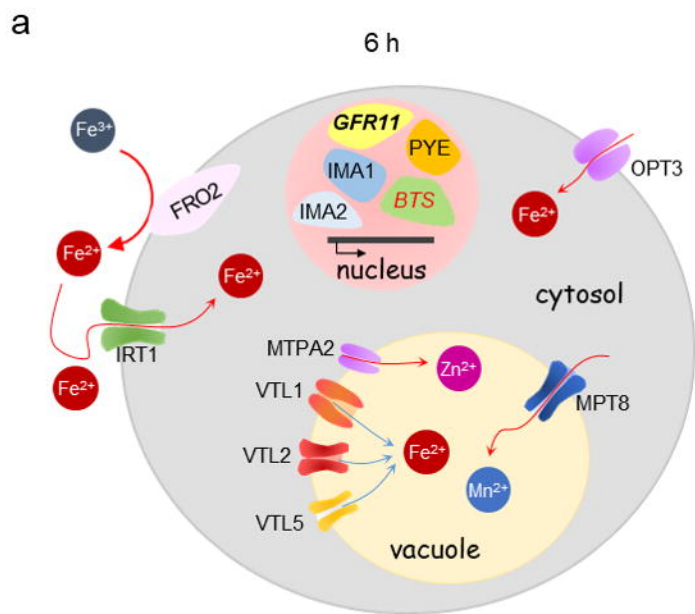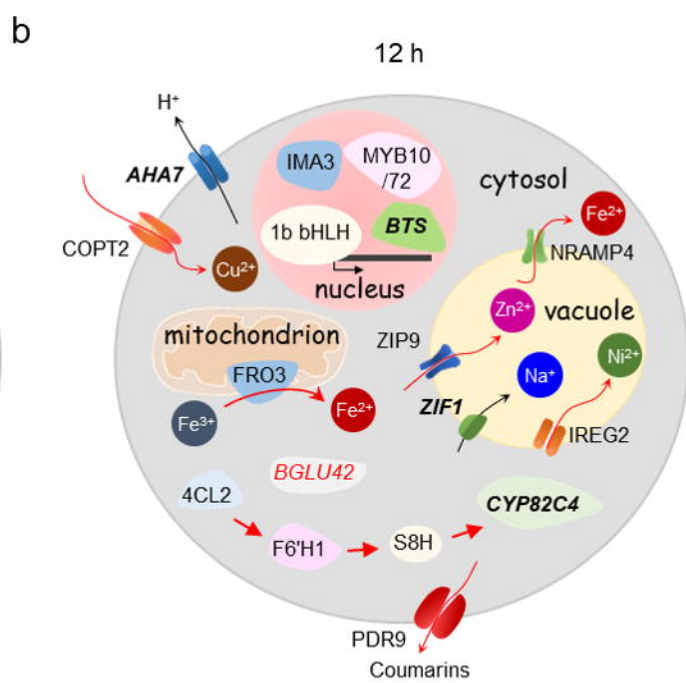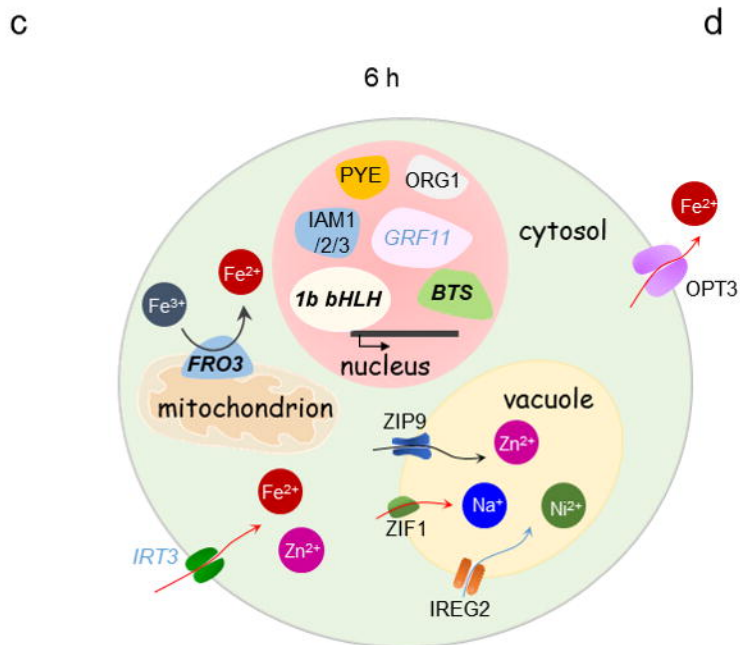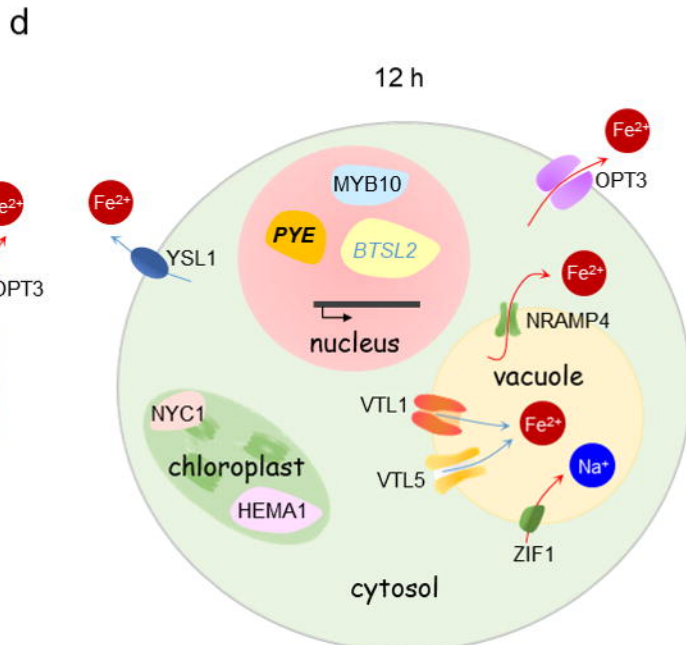

# Roots

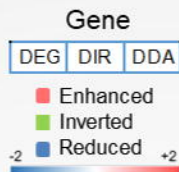

Linolenic acid

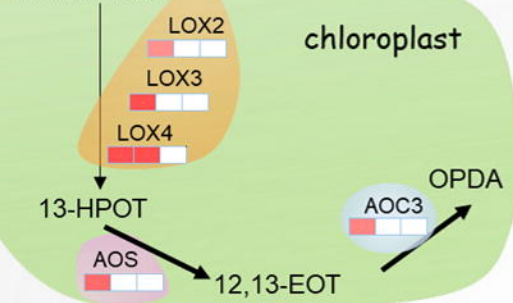

OPDA

OPR3

OPDA

OPC8

OPCL

OPC8-CoA

ACX1

KAT2

MFP

(+)-7-iso-JA

**peroxisome**

ABCD1

**cytosol**

(+)-7-iso-JA

JAR1

JA-Ile

JMT

MeJA

**nucleus**

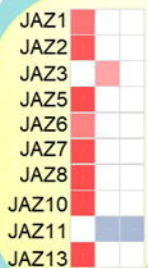

JA-Ile

MYC2

Gene expression

CYP94B3

12OH-JA-Ile

IAR3

ILL6

ILL5

ILL5

ILL6

ILL5

ILL6

ILL5

12OH-JA

**endoplasmic reticulum**

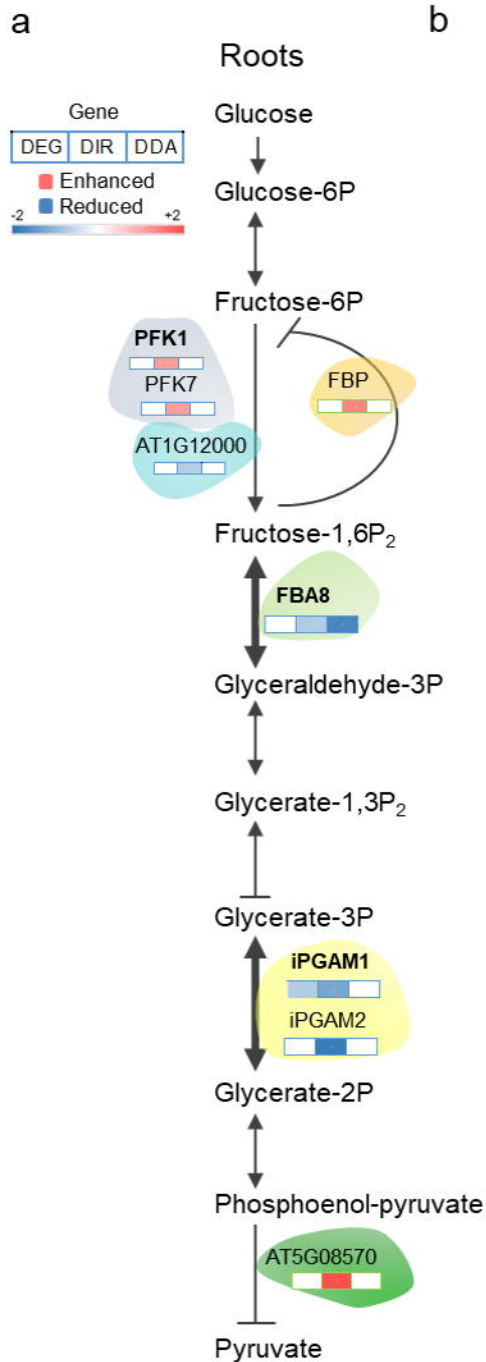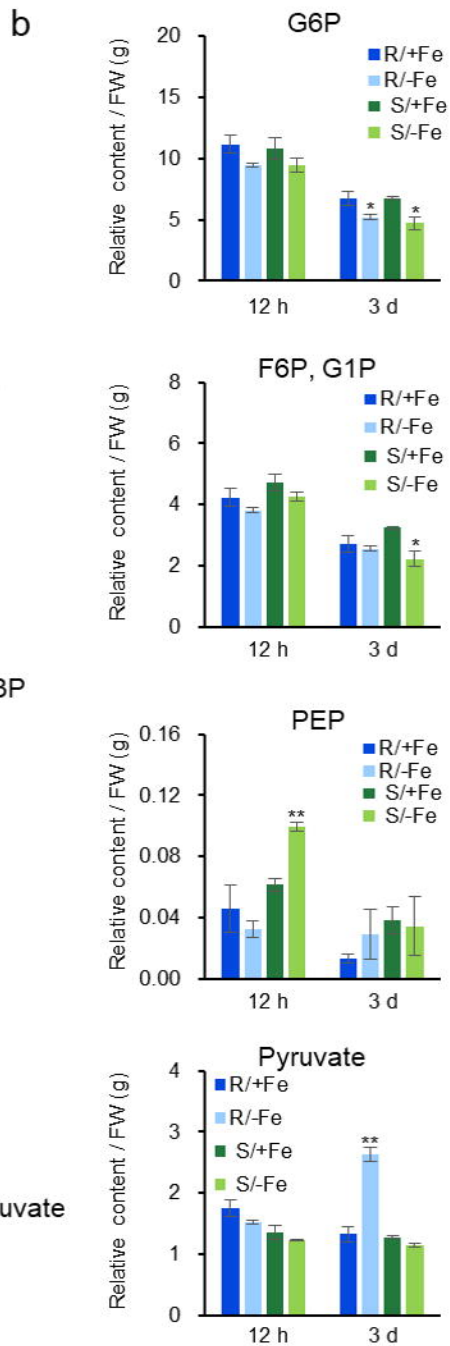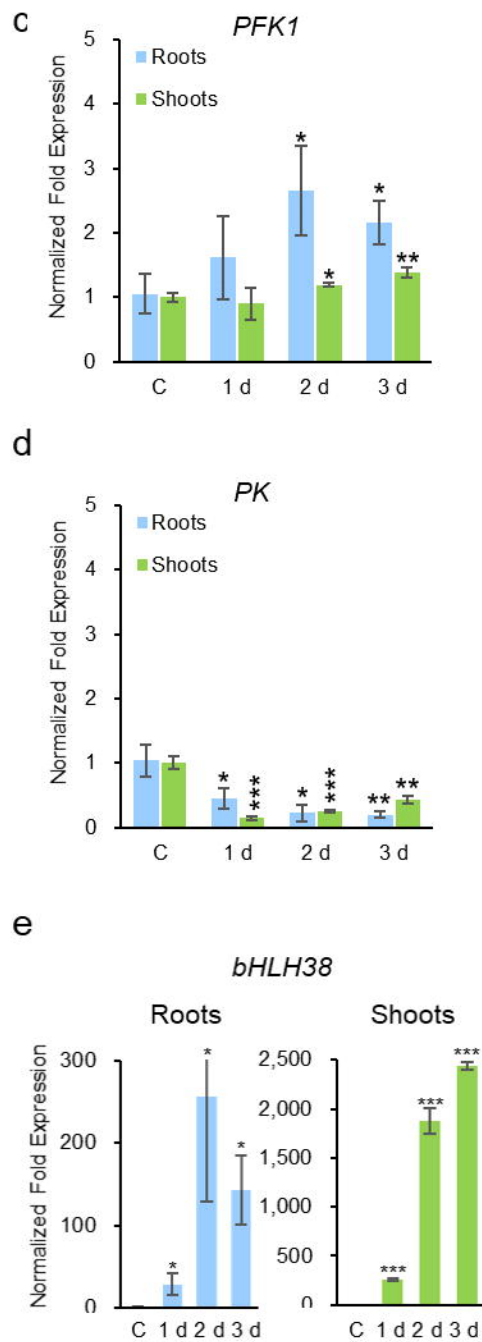

a

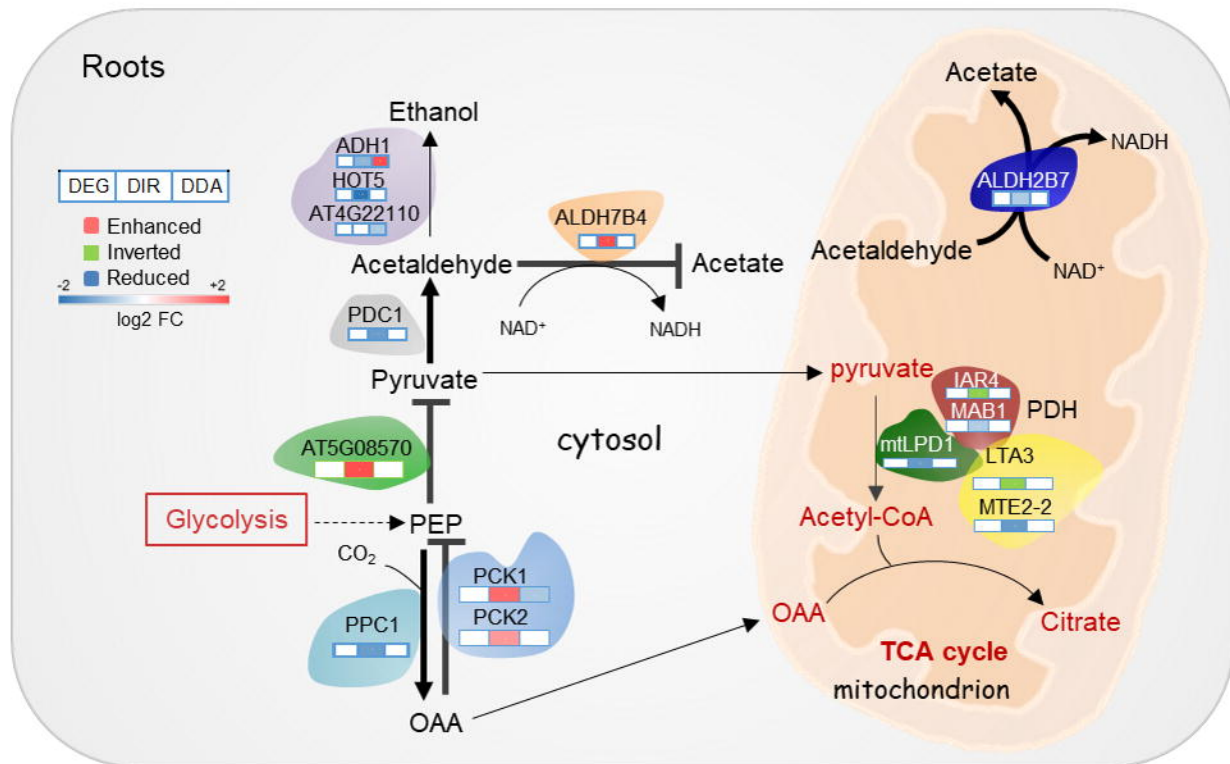

b

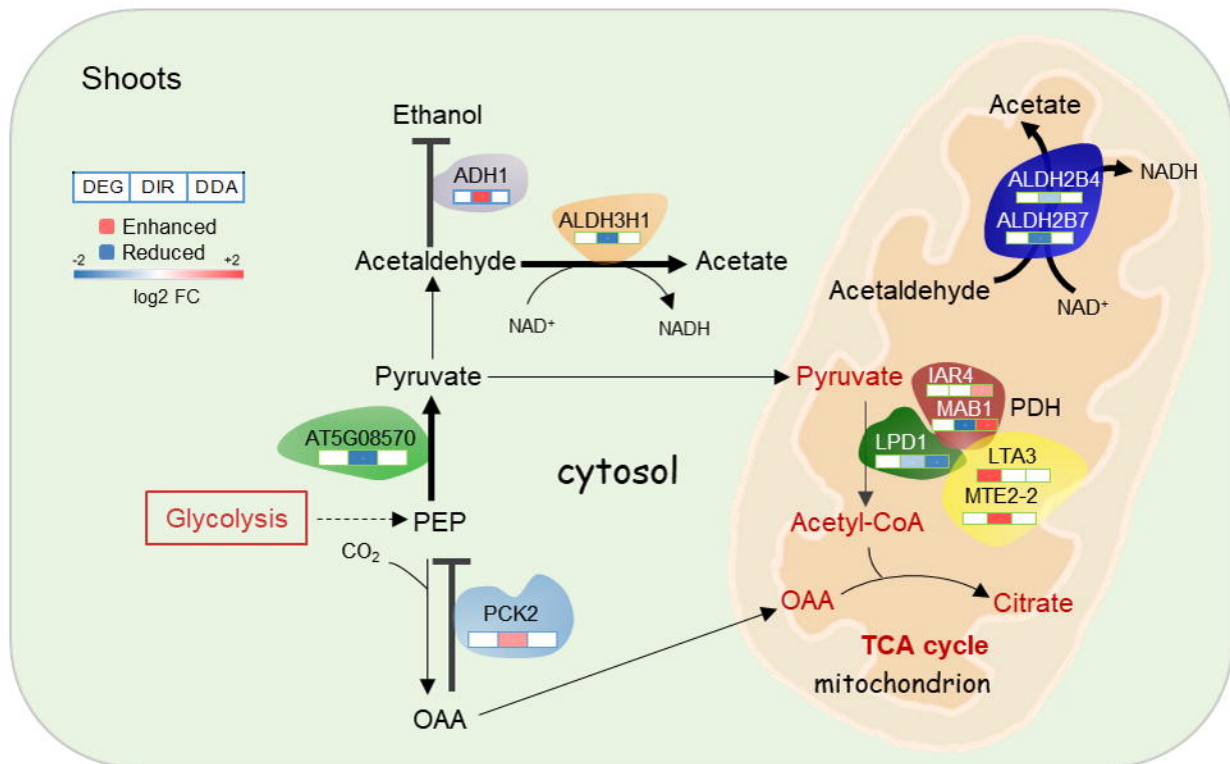



**a**

DEG vs DIR

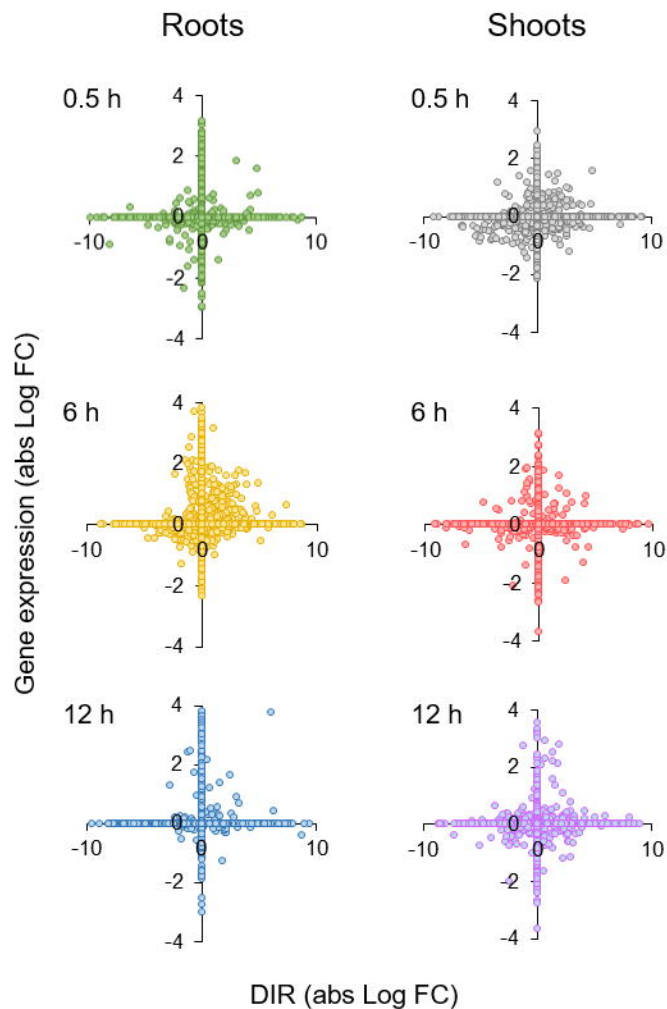**b**

DEG vs DDA

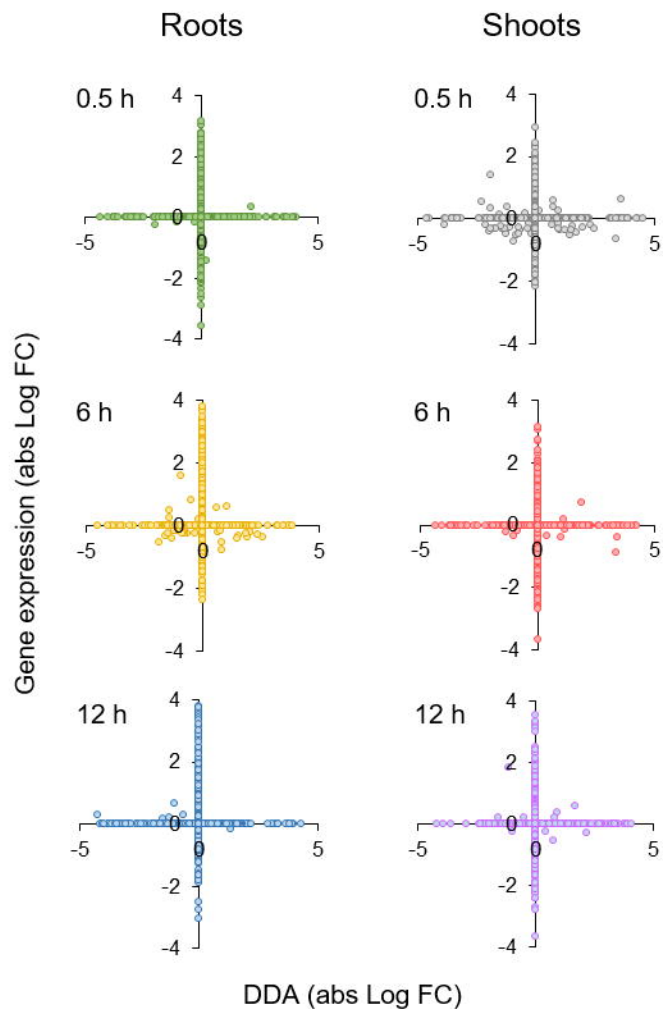

**a**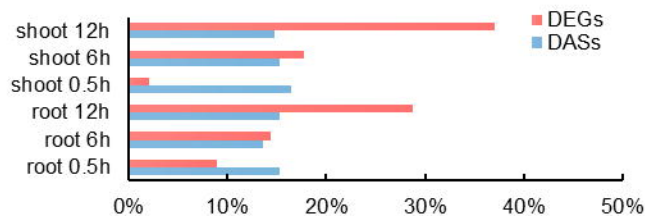**b**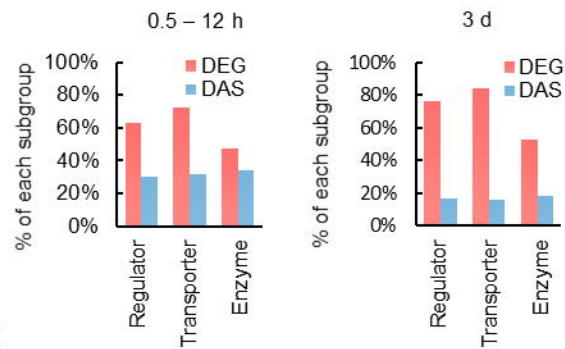**c**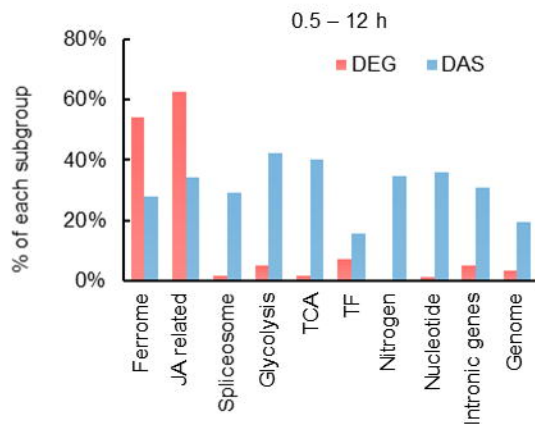**d**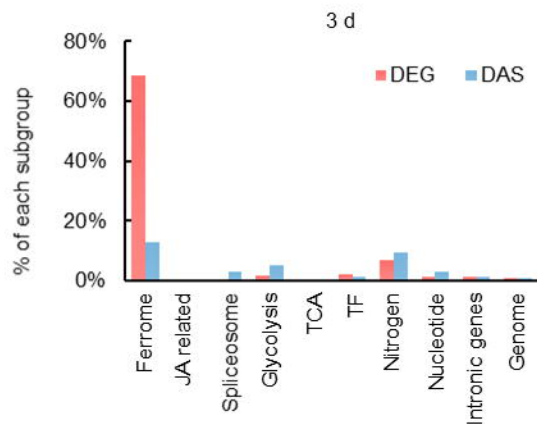

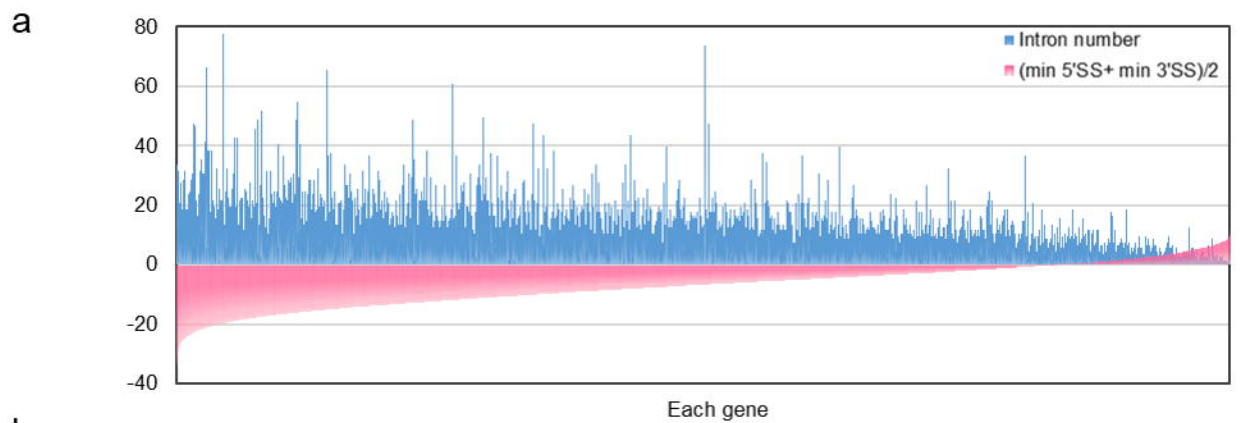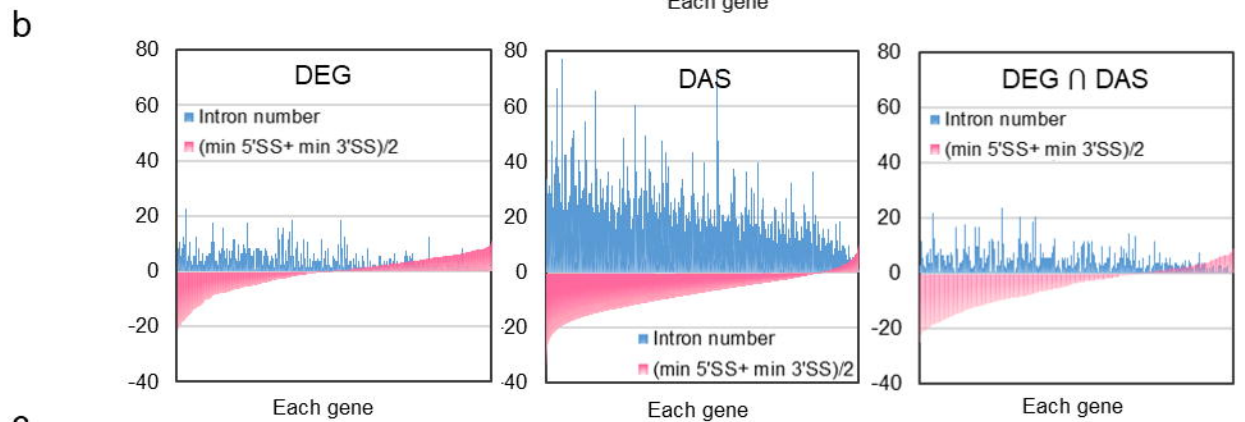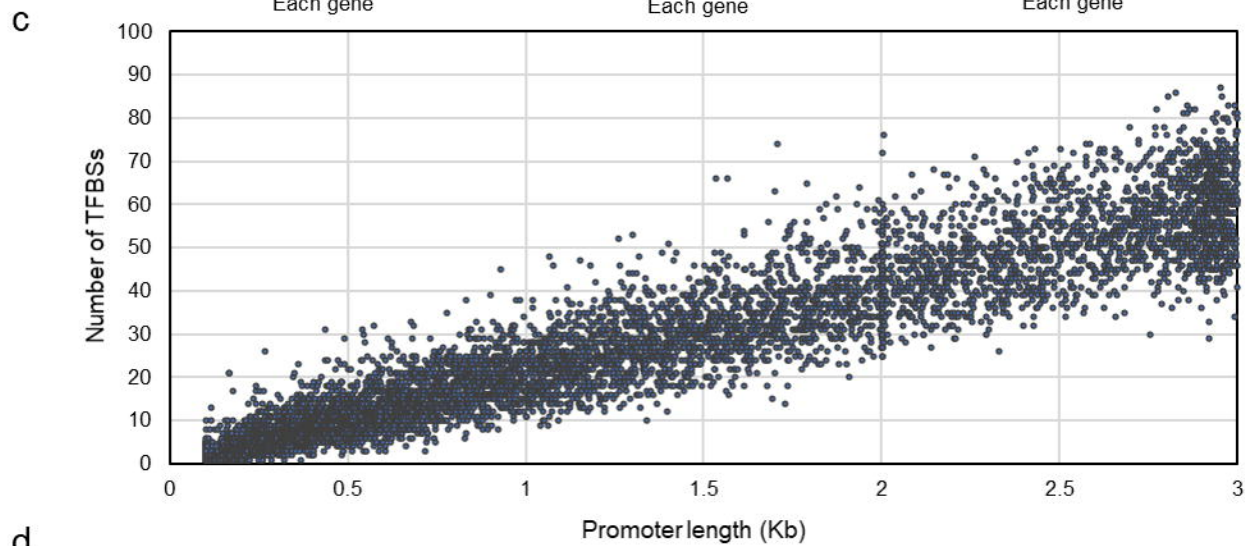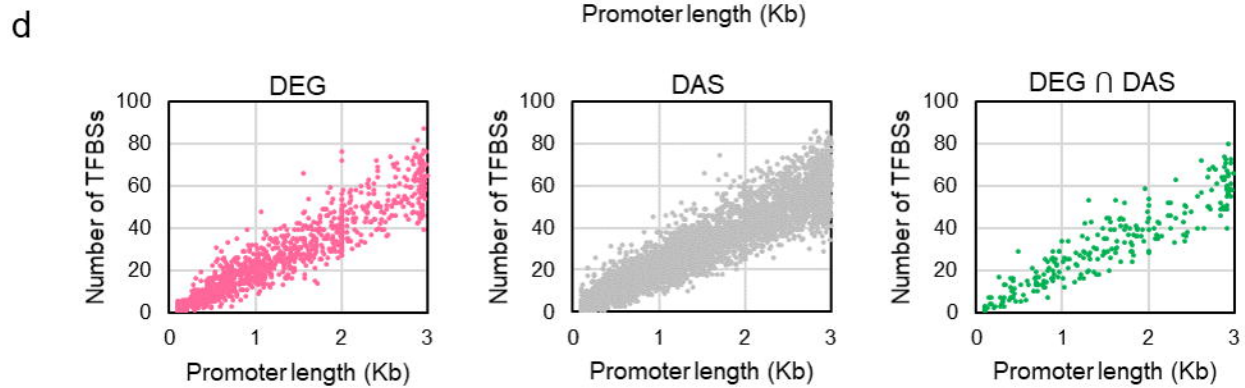

**a**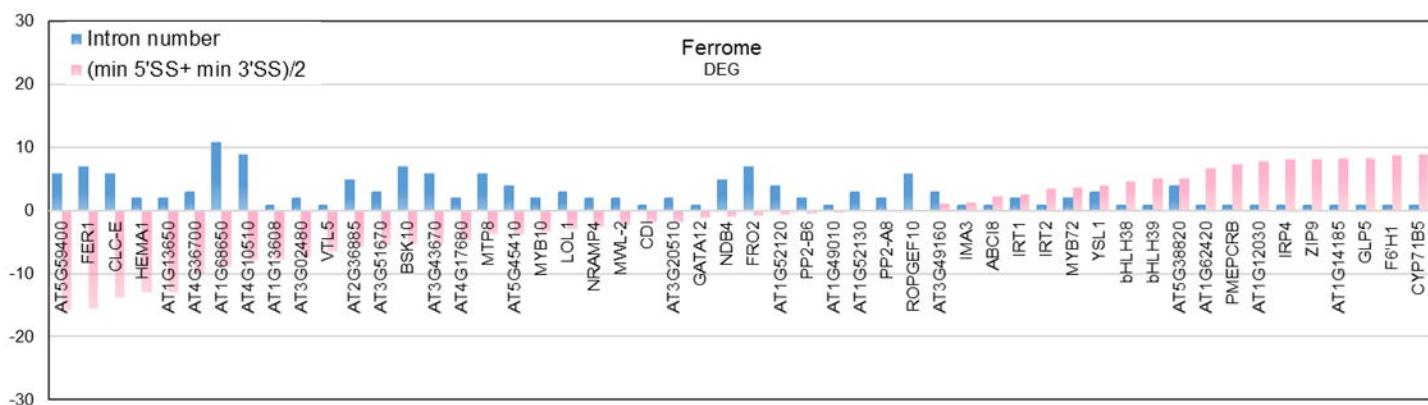**b**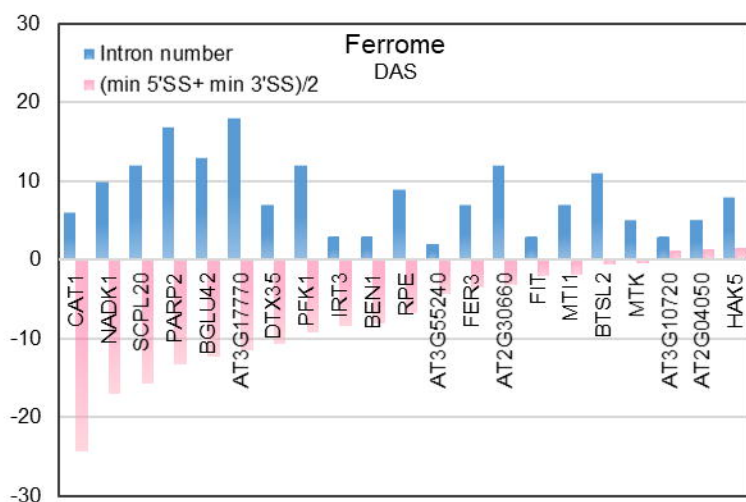**c**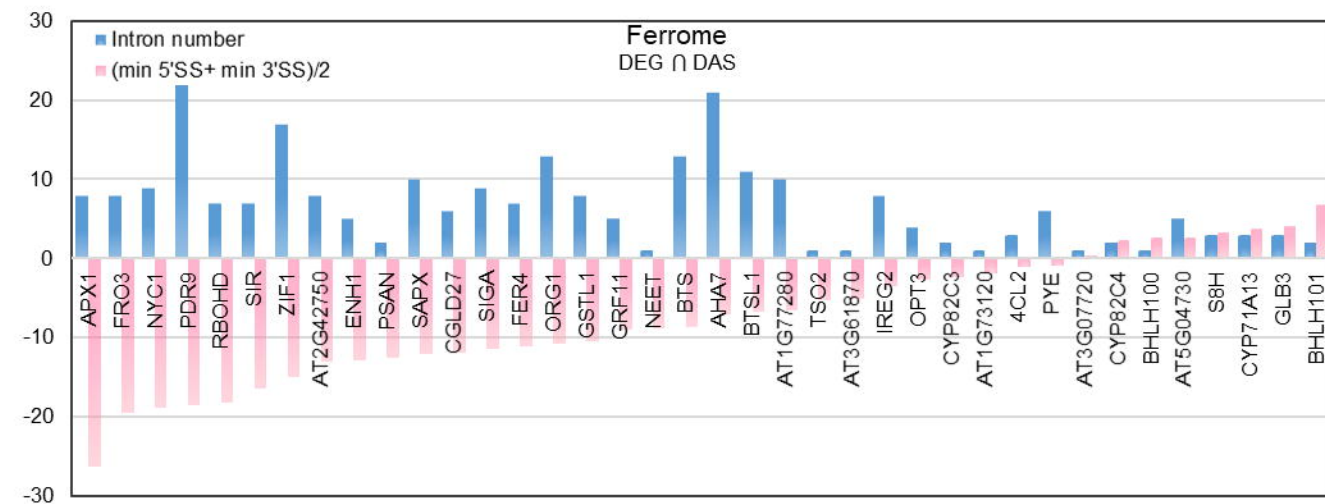

**a**

Roots

Shoots

All Ferrome Glycolysis TCA JA Spliceosome TF

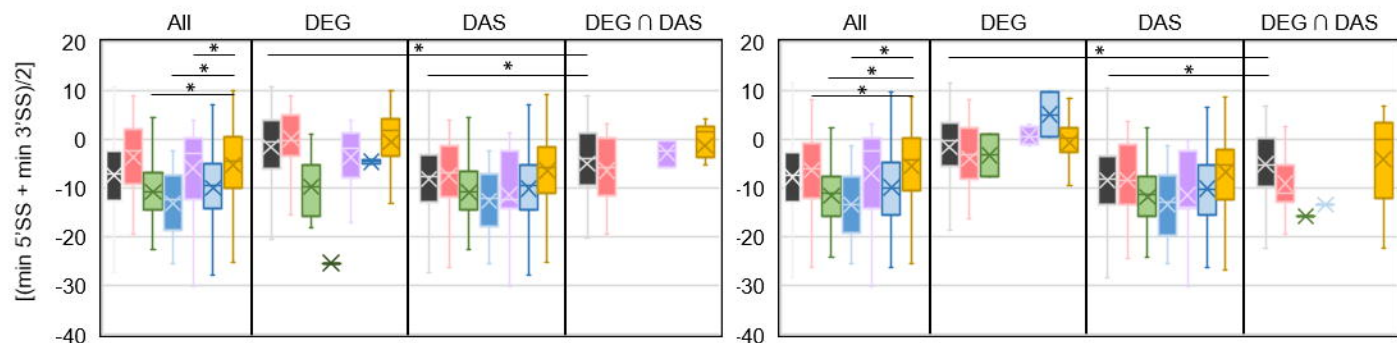**b**

Intron number of each gene

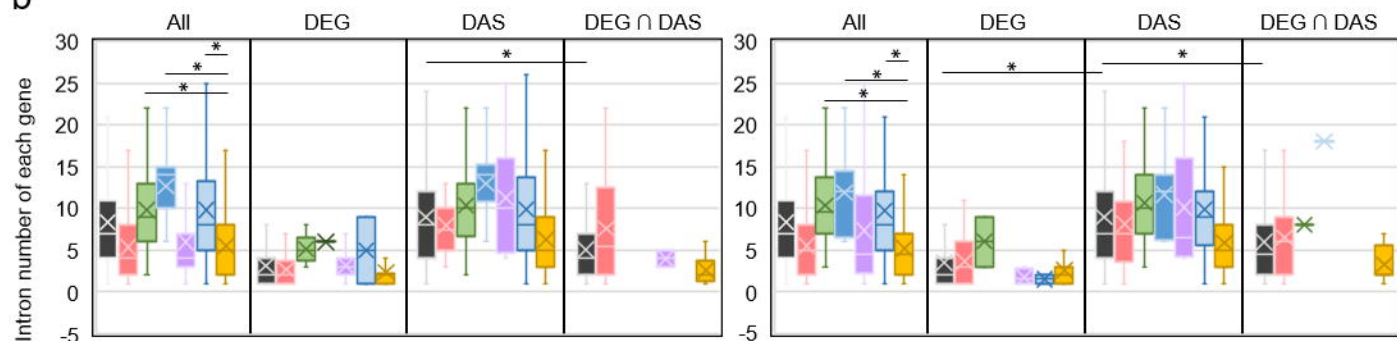**c**

TFBSs

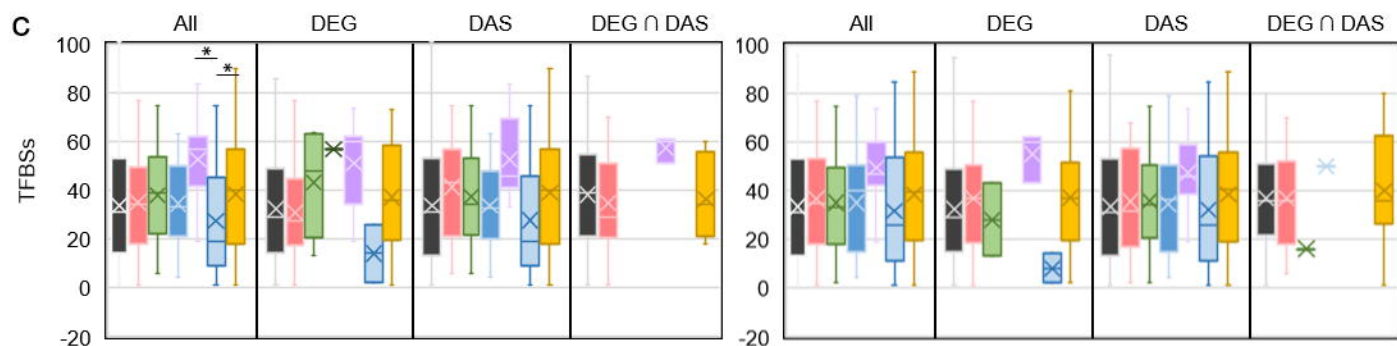**d**

Promoter length

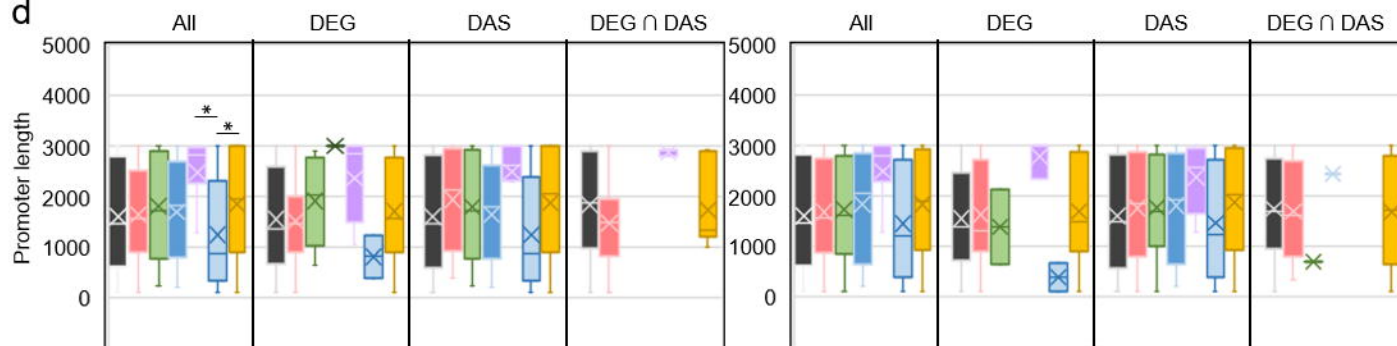

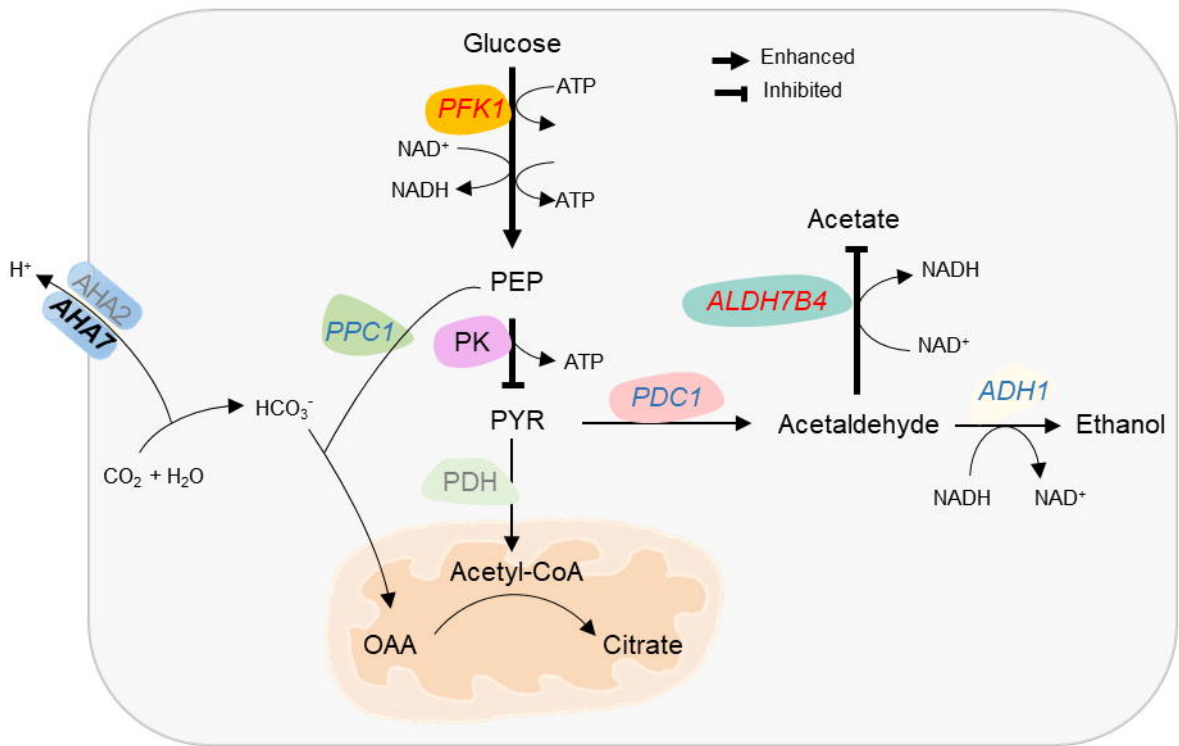

Source: https://www.biorxiv.org/content/10.1101/2021.09.01.458651v1.full.pdf
